1  
2  
3  
4  
5  
6  
7  
8  
9  
10  
11  
12  
13  
14  
15  
16  
17  
18  
19  
20  
21

## **Coronavirus hemagglutinin-esterase and spike proteins co-evolve for functional balance and optimal virion avidity**

**Yifei Lang<sup>1</sup>, Wentao Li<sup>1</sup>, Zeshi Li<sup>2</sup>, Danielle Koerhuis<sup>1</sup>, Arthur C.S. van den Burg<sup>1</sup>, Erik Rozemuller<sup>3</sup>, Berend-Jan Bosch<sup>1</sup>, Frank J.M. van Kuppeveld<sup>1</sup>, Geert-Jan P.H. Boons<sup>2,4,5</sup>, Eric G. Huizinga<sup>6</sup>, Hilde M. van der Schaar<sup>3,7</sup>, and Raoul J. de Groot<sup>1\*</sup>**

<sup>1</sup>Virology Division, Department of Infectious Diseases and Immunology, Faculty of Veterinary Medicine, Utrecht University, 3584 CH Utrecht, the Netherlands; <sup>2</sup>Department of Chemical Biology and Drug Discovery, Utrecht Institute for Pharmaceutical Sciences and Bijvoet Center for Biomolecular Research, Utrecht University, 3584 CG Utrecht, The Netherlands; <sup>3</sup>GenDx B.V., Yalelaan 48, 3584 CM Utrecht, the Netherlands; <sup>4</sup>Department of Chemistry, University of Georgia, Athens, GA 30602; <sup>5</sup>Complex Carbohydrate Research Center, University of Georgia, Athens, GA 30602; <sup>6</sup>Crystal and Structural Chemistry, Bijvoet Center for Biomolecular Research, Faculty of Sciences, Utrecht University, 3584 CH Utrecht, the Netherlands; <sup>7</sup>Present address: Batavia Biosciences B.V., Zernikedreef 16, 2333 CL Leiden, The Netherlands.

\* Lead contact and corresponding author; E-mail: [r.j.degroot@uu.nl](mailto:r.j.degroot@uu.nl)

## 22 **ABSTRACT**

23 Human coronaviruses OC43 and HKU1 are respiratory pathogen of zoonotic origin that have gained  
24 worldwide distribution. OC43 apparently emerged from a bovine coronavirus (BCoV) spill-over. All  
25 three viruses attach to 9-*O*-acetylated sialoglycans via spike protein S with hemagglutinin-esterase HE  
26 acting as a receptor-destroying enzyme. In BCoV, an HE lectin domain promotes esterase activity  
27 towards clustered substrates. OC43 and HKU1, however, lost HE lectin function as an adaptation to  
28 humans. Replaying OC43 evolution, we knocked-out BCoV HE lectin function and performed forced  
29 evolution-population dynamics analysis. Loss of HE receptor-binding selected for second-site  
30 mutations in S, decreasing S binding affinity by orders of magnitude. Irreversible HE mutations  
31 selected for cooperativity in virus swarms with low-affinity S minority variants sustaining propagation  
32 of high-affinity majority phenotypes. Salvageable HE mutations induced successive second-site  
33 substitutions in both S and HE. Apparently, S and HE are functionally interdependent and co-evolve to  
34 optimize the balance between attachment and release. This mechanism of glycan-based receptor  
35 usage, entailing a concerted, fine-tuned activity of two envelope protein species, is unique among  
36 CoVs, but reminiscent of that of influenza A viruses (IAVs). Apparently, general principles fundamental  
37 to virion-sialoglycan interactions prompted convergent evolution of two important groups of human  
38 and animal pathogens.

## 39 INTRODUCTION

40 The subfamily *Orthocoronavirinae* comprises a group of enveloped positive-strand RNA viruses of  
41 clinical and veterinary significance. Adding to the socio-economic impact of coronaviruses (CoVs)  
42 already extant in humans and livestock, the emergence of 'new' CoVs through cross species  
43 transmission poses an ever-looming threat to public health, animal health, and food production.  
44 Seven coronaviruses are known to infect humans, but not all of them have become established. The  
45 introduction of SARS CoV in 2002 from horseshoe bats with masked palm civets as incidental transient  
46 hosts, was rapidly contained through quarantine measures<sup>1</sup>. MERS CoV, natural to dromedary camels,  
47 causes a classical zoonotic infection with limited human-to-human spread<sup>2</sup>. December 2019, a  
48 member of the species *Severe acute respiratory syndrome related coronavirus* (SARS-CoV), called  
49 SARS-CoV-2 and 79.5% identical to the 2002 SARS CoV variant, emerged in Wuhan, China<sup>3,4</sup> to progress  
50 to full scale pandemicity. Chances are, SARS-CoV-2 will eventually become established in the human  
51 population.

52 Four other respiratory coronaviruses of zoonotic origin already did succeed in becoming true human  
53 viruses with world-wide distribution<sup>5-7</sup>. Among them are HKU1 and OC43 (subgenus *Embecovirus*,  
54 genus *Betacoronavirus*), related yet distinct viruses that arose from different zoonotic progenitors and  
55 entered the human population independently. OC43 is far more related to bovine coronavirus (BCoV),  
56 its presumptive ancestor, with early isolates sharing 97% genome identity<sup>8,9</sup>. Together with viruses of  
57 swine, canines, equines and lagomorphs, OC43 and BCoV are considered host range variants of the  
58 virus species *Betacoronavirus-1* (collectively referred to as  $\beta$ 1CoVs throughout)<sup>7</sup>. OC43 apparently  
59 emerged 70 to 130 years ago from a single cross species transmission event that gave rise to a human-  
60 only virus<sup>8-10</sup>. Like OC43, other  $\beta$ 1CoVs also exhibit host specificity<sup>8,11</sup>. While these observations attest  
61 to the host promiscuity and zoonotic potential of embecoviruses and  $\beta$ 1CoVs in particular, they are  
62 also indicative for the existence of host barriers, the breaching of which selects for adaptive mutations  
63 that result in host specialization and, ultimately, virus speciation. Conceivably, comparative studies of

64 BCoV and OC43 may identify factors that promote or restrict cross species transmission of CoVs and  
65 thus further our understanding of the requirements for colonization of the human host.

66 Embecoviruses, OC43 and BCoV included, differ from other CoVs in that they encode two types of  
67 surface projections. Homotrimeric ‘peplomers’ comprised of spike protein S and extending 20 nm  
68 from the viral membrane, mediate virion attachment to entry receptors and membrane fusion<sup>12</sup>.

69 Interspersed are stubby 8-nm homodimeric projections comprised of the hemagglutinin-esterase  
70 (HE)<sup>13–15</sup>, a dual function protein typically encompassing a receptor-binding lectin domain specific for  
71 *O*-acetylated sialic acid (*O*-Ac-Sia) and a receptor destroying sialate-*O*-acetylerase domain<sup>16–20</sup>. The  
72 HE lectin domain contributes to virion attachment, but at the same time enhances sialate-*O*-  
73 acetylerase activity towards clustered sialoglycotopes<sup>11</sup>.

74 Some embecoviruses, like mouse hepatitis virus (MHV) and related CoVs in rodents, attach to 4- or 9-  
75 *O*-acetylated sialosides (4- or 9-*O*-Ac-Sias) via HE<sup>21–25</sup> and to a proteinaceous entry receptor via S<sup>26,27</sup>.

76 Others, animal  $\beta$ 1CoVs included, bind to 9-*O*-Ac-Sias via HE<sup>28</sup> but, remarkably, also via S<sup>29,30</sup> or, in the  
77 case of human coronaviruses OC43 and HKU1, even exclusively via S<sup>11,31,32</sup>.

78 Structure function analyses of HE and S proteins have yielded a wealth of data on ligand binding,  
79 substrate selection and protein-glycan interactions. The receptor binding sites (RBSs) of CoV HE lectin  
80 domains and those in related proteins of toro- and influenza C/D viruses<sup>22,33–35</sup> differ in sequence and  
81 structure yet conform to a common architectural design with a deep hydrophobic pocket (‘P1’) to  
82 accommodate the crucial sialate-*O*-acetyl moiety, and an adjacent pocket or depression (‘P2’) to  
83 accept the 5-*N*-acyl group<sup>17,21,22,33</sup>. Characteristically, P1 and P2 are separated by an aromatic side  
84 chain and binding of the ligand is stabilized further through electrostatic protein-glycan interactions  
85 typically involving distinctive Sia functions such as the Sia glycerol side chain, the 5-*N*-Acyl and/or the  
86 Sia carboxylate. The RBS for 9-*O*-Ac-Sia in the S proteins of BCoV and OC43, identified by comparative  
87 structural analysis<sup>32</sup> and confirmed by the cryo-EM holostructure of OC43 S<sup>36</sup>, conforms to this  
88 blueprint. Moreover, this site is structurally and functionally conserved in HKU1<sup>32</sup>.

89 Much less is known about the functional relationship between S and HE, and the role of HE in particular  
90 remains poorly understood. In MHV, HE expression is dispensable for replication and rapidly lost  
91 during cell culture propagation<sup>15</sup>. Conversely, in  $\beta$ 1CoVs, HE seems critical for infection. In OC43, loss  
92 of HE-associated acetyl esterase activity abrogates the production of infectious virus and virus  
93 dissemination in cell culture<sup>37</sup>. Moreover, acetyl-esterase inhibitors impede BCoV replication<sup>19</sup>, and  
94 antibodies against HE neutralize the virus *in vitro* and *in vivo*<sup>38-40</sup>. Still, even among  $\beta$ 1CoVs there are  
95 differences in HE function apparently correlating with host specificity. Whereas HE lectin activity is  
96 strictly maintained in BCoV<sup>28</sup>, OC43 lost this function through progressive accumulation of mutations  
97 in the HE RBS, apparently as an adaptation to replication in the human respiratory tract<sup>11</sup>.  
98 Nevertheless, isolates of either virus propagate in cultured cells. To better understand the  
99 consequences of loss of HE lectin function as it occurred during OC43 and also HKU1 evolution, we  
100 took a reverse genetics/forced evolution approach with BCoV as a model. The findings reveal that HE  
101 and S are functionally interdependent and that the acquisition of HE by a proto-embecovirus allowed  
102 its  $\beta$ 1CoV descendants to adopt strategies for reversible virion-sialoglycan attachment, remarkably  
103 similar to those of influenza A viruses.

## 104 RESULTS

105 **Disruption of HE lectin function selects for mutations in S.** To study the role and importance of HE in  
106  $\beta$ 1CoV propagation, we developed a reverse genetics system for BCoV strain Mebus (**sFig. 1A**) based  
107 on targeted RNA recombination<sup>41,42</sup>. Recombinant 'wildtype' BCOVs (rBCoV) with parental type HE and  
108 S, but with accessory ORF4a replaced by the *Renilla* luciferase gene (rBCoV-Rluc), were readily  
109 generated upon seeding acceptor-virus-infected, donor RNA-transfected mouse LR7 cells onto  
110 monolayers of feeder HRT18 cells. rBCoV-Rluc arose and within seven days grew to final titers  
111 routinely obtained for wildtype BCoV ( $\sim 10^8$  TCID<sub>50</sub>/ml).

112 Generating BCoV-Rluc derivatives defective in HE lectin function proved more cumbersome. To  
113 abolish the HE RBS, we substituted Phe<sup>211</sup>, which is key to ligand binding<sup>17</sup>(**sFig. 1B**), by Ala via two  
114 nucleotide substitutions to block reversion. Mutant viruses were recovered eventually, but, in 3 out  
115 of 4 successful trials, a multistep 160-hr rescue did not suffice and an additional 72-96 hr blind passage  
116 was required (**Fig. 1A**).

117 Sequence analysis of clonal virus populations, obtained by endpoint dilution, confirmed the presence  
118 of the HE Phe<sup>211</sup>Ala substitution in all cases. Surprisingly, the purified viruses all suffered single site  
119 mutations in S, clustering in domain S1<sup>A</sup> (aa 15-302) in proximity of the RBS (**Figs. 1A-C; sFig. 2**). Two  
120 of the trials yielded multiple S variants and some variants -Thr<sup>83</sup>Ile and Leu<sup>89</sup>Pro- emerged  
121 independently in separate experiments (**Fig. 1A**). The mutations map to three distinct S RBS elements  
122 (**Fig. 1C, sFig. 2C**; nomenclature according to<sup>32</sup>). Ile<sup>26</sup>Ser and Asn<sup>27</sup>Ser locate in the S1<sup>A</sup>  $\beta$ 1 element  
123 within the N-terminal L1- $\beta$ 1-L2 segment (aa 15-33) that walls pocket P1; P1 is crucial for ligand binding  
124 as it accommodates the all-important sialate-9-*O*-acetyl moiety<sup>32,36</sup>. Moreover, in the OC43 S cryo-EM  
125 holostructure, the Asn<sup>27</sup> side chain hydrogen bonds with the 9-*O*-acetyl carbonyl<sup>36</sup>. Leu<sup>89</sup>Pro in S1<sup>A</sup>  
126 element 3<sub>10</sub>1 is immediately adjacent to Trp<sup>90</sup>. The latter is arguably the most critical residue in the  
127 RBS as its indole side chain separates the P1 and P2 pockets, and its replacement precludes receptor-  
128 binding and virus infectivity<sup>32</sup>. Finally, Gly<sup>82</sup>Glu and Thr<sup>83</sup>Ile substitutions occurred in S1<sup>A</sup> element  $\beta$ 5  
129 that interacts with the sialate carboxylate through hydrogen bonding with Lys<sup>81</sup> and Thr<sup>83</sup>.

130 As measured by solid phase lectin binding assay (sp-LBA) with S1<sup>A</sup>-Fc fusion proteins and bovine  
131 submaxillary mucin (BSM) as ligand, all mutations significantly reduced S binding to 9-*O*-Ac-Sia albeit  
132 to widely different extents. S1<sup>A</sup>-Fc binding affinities of the mutants were 500-fold (Asn<sup>27</sup>Ser) to more  
133 than 10.000-fold (Ile<sup>26</sup>Ser; Gly<sup>82</sup>Glu) lower than that of parental BCoV S1<sup>A</sup>-Fc (**Fig. 1D**).

134 Loss of the HE lectin RBS would both abolish HE-assisted virion attachment to 9-*O*-Ac-Sia receptor  
135 determinants as well as reduce virion-associated receptor-destroying sialate-*O*-acetyltransferase activity  
136 towards clustered glycotopes<sup>11</sup>. The findings suggest that the HE-Phe<sup>211</sup>Ala substitution creates a  
137 fitness defect that can be alleviated not by increasing but by dramatically reducing the affinity of the  
138 S RBS. Thus, the defect apparently is caused by loss of virion-associated RDE activity rather than by  
139 loss of overall virion avidity.

140 **Loss of HE lectin function exerts a fitness cost by affecting reversible virion attachment.** In principle,  
141 downregulation of HE esterase activity consequential to loss of lectin function, could affect virus  
142 propagation at two stages of the infectious cycle, namely virus release, which would require depletion  
143 of intracellular and cell surface receptor pools, and (pre)attachment. We recently reported that G-  
144 deficient vesicular stomatitis (VSV) virions pseudotyped with wildtype BCoV S require exogenous HE  
145 for efficient infection<sup>32</sup>. S1<sup>A</sup> mutations that reduce S affinity inhibit infection, but, as we now show,  
146 only when HE is present. VSV virions pseudotyped with low affinity mutant S proteins were less reliant  
147 on or even inhibited by exogenous HE with decreasing S RBS affinity (**Fig. 1E**). The findings provide  
148 direct proof that the S1<sup>A</sup> mutations act at the level of virion attachment and support the notion that  
149 the S1<sup>A</sup> mutations, selected for in HE-defective rBCoVs, restore reversibility of receptor binding by  
150 lowering S affinity and thereby protect against inadvertent attachment to decoy receptors.

151 **HE lectin-deficient recombinant BCoVs are genetically stable when grown in the presence of**  
152 **exogenous receptor-destroying enzyme.** To test whether loss of virion-associated RDE activity in  
153 rBCoV-HE-F<sup>211</sup>A/S<sup>wt</sup>/Rluc might be compensated for by adding exogenous soluble HE to the culture  
154 medium, we seeded infected/transfected LR7 cells onto HRT18 cell monolayers, supplemented the

155 cell culture supernatant with BCoV HE-Fc<sup>17</sup> to final concentrations of 1 pg to 10 µg/ml, and allowed  
156 infection to proceed for 120 hr. While in the absence of HE-Fc there was no sign of virus propagation  
157 as detectable by IFA, concentrations of exogenous sialate-*O*-acetyltransferase as low as 1 ng/ml to up to  
158 1 µg/ml promoted virus growth (**Fig. 2A**).

159 To determine whether these conditions would allow isolation of rBCoV-HE-F<sup>211</sup>A without mutations in  
160 S1<sup>A</sup>, we performed targeted recombination and rescued recombinant viruses by 160 hr multistep  
161 propagation as before, but now with culture supernatant supplemented with 100 ng/ml HE-Fc (**Fig.**  
162 **2B**). Sanger sequence analysis of RT-PCR amplicons showed that all viruses cloned by endpoint dilution  
163 of the 160-hr stock (n=4) coded for mutant HE-Phe<sup>211</sup>Ala in combination with wildtype S1<sup>A</sup>. To assess  
164 the stability of clonal rBCoV-HE-F<sup>211</sup>A/S<sup>wt</sup>/Rluc, the virus population resulting from a subsequent 120-  
165 hr amplification in the presence of exogenous HE-Fc was analyzed by Next-Generation Sequencing  
166 (NGS), which allows for the detection of low frequency mutants. Sequence variation in HE and S1<sup>A</sup> was  
167 distributed randomly and did not exceed background levels (<0.15%). More than 99.5% of the viruses  
168 coded for HE-Phe<sup>211</sup>Ala, while preserving parental type S1<sup>A</sup> (**Fig. 2B**).

169 **Loss of HE lectin function gives rise to mixed virus population with competition and cooperativity**  
170 **among S affinity variants.** With a clonal, virtually pure stock of rBCoV-HE-F<sup>211</sup>A/S<sup>wt</sup> available, we  
171 performed controlled forced evolution experiments. The virus was serially passaged involving three  
172 consecutive 120-hr multistep propagation rounds in HRT18 cells but now in the absence of exogenous  
173 HE-Fc, with the initial infection at multiplicity of infection (MOI) of 0.005 (**Fig. 2C**). In trial 1, viral titers  
174 in passage 1 (p1) increased only slowly to 3 x 10<sup>4</sup> and 2 x 10<sup>4</sup> TCID<sub>50</sub>/ml (measured with or without  
175 exogenous HE-Fc, respectively). The withdrawal of exogenous RDE during viral passage immediately  
176 selected for mutations in S1<sup>A</sup>. Virus cloning by endpoint dilution of the 120-hr p1 sample yielded S RBS  
177 mutants Asn<sup>27</sup>Ser, Thr<sup>83</sup>Ile and Ile<sup>26</sup>Ser (**Fig. 2C**) – all three of which had been seen before (**Fig. 1A**).  
178 NGS analysis revealed the true complexity of the p1 population (**Fig. 2C**) and identified two additional  
179 S1<sup>A</sup> variants with substitutions -His<sup>173</sup>Tyr and Arg<sup>197</sup>Cys- more distal from the RBS (**sFigs. 2D, 3A, B**).  
180 His<sup>173</sup>Tyr also reduced the relative binding affinity of S1<sup>A</sup>-Fc albeit less dramatically than the other



181 mutations, namely by 30-fold (**Table 1**). The Arg<sup>197</sup>Cys mutation seemingly falls in a separate category  
182 as it reduced S1<sup>A</sup>-Fc expression levels by more than 90% suggestive of defective folding (**sFig. 3C**).  
183 Apparently, aberrant disulfide-bonding causes most of the fusion protein to be retained in the ER with  
184 only a minor, presumably properly folded fraction slipping through to become secreted.  
185 All in all, the p1 population was comprised for virtually 100% of HE-Phe<sup>211</sup>Ala mutants, 40% of which  
186 in combination with parental BCoV S, the remaining 60% with second-site mutations in S1<sup>A</sup> (**Fig. 2C**;  
187 **Table 1**). Of the latter, the ultra-low affinity variant S1<sup>A</sup>-Ile<sup>26</sup>Ser was the most abundant at 46% and  
188 the Asn<sup>27</sup>Ser variant the least at less than 1%. However, upon a subsequent round of 120-hr multistep  
189 propagation, the tables were turned with S1<sup>A</sup>-Asn<sup>27</sup>Ser now comprising almost 40% of the p2  
190 population and the Ile<sup>26</sup>Ser variant reduced to 0.7%. In addition, four other S1<sup>A</sup> variants emerged. One  
191 of these had a mutation in S1<sup>A</sup> RBS loop L1, Val<sup>29</sup>Gly, and a relative binding affinity close to that of the  
192 Asn<sup>27</sup>Ser mutant (**Fig. 2C; Table 1**). We also identified at position 75 a second S1<sup>A</sup> Cys-substitution  
193 mutant, which like Arg<sup>197</sup>Cys, presumably disrupts the RBS through aberrant disulfide bonding (**sFig.**  
194 **3**). Remarkably, two other S1<sup>A</sup> variants arose with mutations -Arg<sup>88</sup>Thr and Pro<sup>174</sup>Leu- that affected  
195 the relative binding affinity only modestly to 0.25 and 0.5 of that of wildtype S1<sup>A</sup>-Fc, respectively  
196 (**Table 1**). Even more remarkably, upon further passage these mutants increased to dominate the p3  
197 population, effectively outcompeting variants with low affinity spikes as well as those with parental  
198 spikes (**Fig. 2C, D**). However, when the p1, p2 and p3 stocks were cloned by endpoint dilution in the  
199 absence of exogenous HE-Fc, only virus variants with low affinity mutations in S1<sup>A</sup> were isolated (**Fig.**  
200 **2C; Table 1**). Strikingly, from the p3 stock, the S1<sup>A</sup>-Asn<sup>27</sup>Ser variant was isolated exclusively against all  
201 odds (10/10 tested;  $p < 10^{-6}$ ) when calculated purely from its frequency in the population (21%).  
202 Conversely, virus cloning by endpoint dilution in the presence of exogenous HE-Fc yielded high affinity  
203 S1<sup>A</sup> mutants Pro<sup>174</sup>Leu (5/11) and Arg<sup>88</sup>Thr (4/11), parental virus rBCoV-HE-Phe<sup>211</sup>Ala/S<sup>wt</sup> (1/11), and  
204 intermediate S affinity variant His<sup>173</sup>Tyr (1/11).  
205 Notably, the conditions selected not only for mutations in S but also in HE. Variants with an Ala<sup>211</sup>Val  
206 substitution in HE emerged in p2, rising to 17% of the p2 end population, to stabilize around this

207 frequency in p3. As a result of this mutation, HE lectin affinity was regained albeit to levels solely  
208 detectable by high-sensitivity nanobead hemagglutination assay, while esterase activity towards  
209 clustered glycotopes in BSM increased 4-fold as compared to HE-Phe<sup>211</sup>Ala, but still remained 125-fold  
210 lower than that of wildtype HE (**sFig. 4**). Apparently, the increase in HE function, minor as it may be,  
211 provides a selective advantage, but apparently one that benefits both low and high affinity S variants,  
212 because the mutation was found in cloned viruses of either type.

213 **Loss of HE lectin function selects for virus swarms with low affinity S escape mutants promoting the**  
214 **emergence and propagation of high-affinity S variants.** To corroborate our observations, the  
215 controlled forced evolution experiment was repeated (**sFig. 5**). As compared to the first trial, there  
216 was a much faster population built-up already in p1 at 120 hr p.i. with final titers reaching  $4 \times 10^8$  and  
217  $3.4 \times 10^7$  TCID50/ml, when measured in the presence or absence of exogenous HE-Fc, respectively.  
218 Surprisingly, in stark contrast to trial 1, the trial 2 p1 population was comprised for about 94% of  
219 viruses expressing wildtype BCoV S. Less than 6% consisted of variants with mutations in S1<sup>A</sup>, four of  
220 low receptor binding affinity (Thr<sup>22</sup>Ile, Asn<sup>27</sup>Tyr, Val<sup>29</sup>Gly, His<sup>173</sup>Tyr), one of near-wildtype binding  
221 affinity (Pro<sup>174</sup>Leu), and, with the exception of Thr<sup>22</sup>Ile, all at positions seen before (**Tables 1, 2**).  
222 Consistent with our previous findings, however, virus purification through endpoint dilution in the  
223 absence of exogenous HE-Fc yielded low affinity mutants (11/11 tested) exclusively (**sFig. 5**). If the  
224 variants in the trial 2 p1 population were all of equal replicative fitness under the conditions applied,  
225 the odds of this result would be less than  $1.10^{-12}$ .

226 At first glance, the two trials would seem to differ in their outcomes. We offer, however, that the  
227 results are in fact consonant and that the main difference is in the speed with which the virus  
228 populations increased and evolved. There is an inherent stochastic element to the experimental  
229 approach and whether the developing quasispecies undergoes slow track (experiment 1) or fast track  
230 evolution (experiment 2) is likely dependent on the time of advent of the first mutant virus and its  
231 properties, for instance whether it is an ultralow (like Ile<sup>26</sup>Ser) or low affinity variant (like Asn<sup>27</sup>Ser).  
232 The findings allow for several conclusions. (i) They confirm and firmly establish that loss of HE lectin

233 function selects for mutations in S1<sup>A</sup> that reduce S receptor-binding affinity and virion avidity. (ii) The  
234 possibilities to reduce the affinity of the S RBS through single site mutations are finite. In several  
235 independent experiments, substitutions in S1<sup>A</sup> occurred at a limited number of positions albeit not  
236 necessarily by the same residue. For example, Asn<sup>27</sup> was replaced both by Ser and Tyr. (iii) The  
237 mutations that reduce S affinity fall into different categories. Most map within or in close proximity of  
238 the RBS to affect receptor-ligand interaction directly. Others, like His<sup>173</sup>Tyr and Pro<sup>174</sup>Leu, are more  
239 distal from the RBS and apparently affect ligand binding indirectly through long range conformational  
240 effects. A third type of mutations, quasi-random Cys substitutions, apparently disrupt S1<sup>A</sup> folding by  
241 promoting non-native disulfide-bonding. While an Arg<sup>197</sup>Cys substitution strongly decreased secretion  
242 of the S1<sup>A</sup>-Fc fusion protein, the biosynthesis and intracellular transport of native trimeric spikes was  
243 seemingly affected to lesser extent. At least, the uptake of S-Arg<sup>197</sup>Cys into VSV pseudotypes was not  
244 noticeably impaired as compared to that of wildtype S (**sFig. 3E**). Still, the mutation did alter the  
245 infectivity of the pseudotyped particles making them less dependent on exogenous HE-Fc (**sFig. 3F**)  
246 presumably by reducing the avidity of S trimers through local S1<sup>A</sup> misfolding and consequential  
247 disruption of the RBS in one or more monomers. (iv) Perhaps most surprisingly, quasispecies  
248 developed in which loss of HE lectin function was compensated at the level of the viral population  
249 with minority low affinity variants, constituting less than 6% of the swarm, not only sustaining the  
250 replication of high affinity variants but actually allowing the latter to flourish and amplify to become  
251 the majority phenotype.

252 **S and HE proteins co-evolve to attain functional balance and optimal virion avidity.** Among the first  
253 mutations fixed upon zoonotic introduction and early emergence of OC43, was a HE-Thr<sup>114</sup>Asn  
254 substitution, which created a glycosylation site at the rim of the lectin domain RBS<sup>11</sup> (**Fig. 3A**). Glycans  
255 attached to HE Asn<sup>114</sup> hamper binding to 9-*O*-Ac-Sia through steric hindrance, causing a 500-fold  
256 reduction in HE avidity (**Fig. 3B**) and a 125-fold in sialate-*O*-acetyltransferase-activity, respectively (**Fig.**  
257 **3C**). We introduced the HE Thr<sup>114</sup>Asn substitution in BCoV, expecting that the glycosylation site would  
258 be rapidly lost through any of several single-nucleotide restorative mutations in HE. Indeed, NGS

259 analysis of the virus swarm arising after targeted recombination showed the glycosylation site to be  
260 destroyed but only in 10% of the population and exclusively by Ser<sup>116</sup>Phe substitution (**Fig. 3D**). This  
261 mutation partially restores HE receptor binding and receptor destruction to 0.125 and 0.17 of that of  
262 wildtype HE, respectively (**Fig. 3B, C**). In the vast majority of viruses, the newly introduced HE  
263 glycosylation site was retained and, instead, S1<sup>A</sup> mutations that reduced S affinity were selected again,  
264 with S-RBS Thr<sup>83</sup> replaced either by Ile (69%) -as seen before (**Figs. 1A, 2C; Table 1**)- or by Asn (10%)  
265 (**Fig. 3D**). The latter mutation reduces S1<sup>A</sup> affinity to 0.008 of that of wildtype.

266 Virus cloning by endpoint dilution yielded, in three out of five isolates, S1<sup>A</sup>-Thr<sup>83</sup>Asn variants with the  
267 newly introduced N-glycosylation site in HE intact (HE-Thr<sup>114</sup>Asn). Furthermore, a single S1<sup>A</sup>-Thr<sup>83</sup>Ile  
268 variant was isolated, but this virus in addition had the N-glycosylation site in HE destroyed (HE-  
269 Thr<sup>114</sup>Asn/Ser<sup>116</sup>Phe) (**Fig. 3D**). The observations led us to entertain the possibility that the mutations  
270 in S1<sup>A</sup> and HE did not occur independently and that, even in viruses expressing low affinity spikes,  
271 partially restorative mutations in HE would yet provide a selective advantage. To test this, the clonal  
272 S1<sup>A</sup>-Thr<sup>83</sup>Asn/HE-Thr<sup>114</sup>Asn variants were serially passaged. All three viruses independently lost HE  
273 Asn<sup>114</sup> glycosylation over time and, saliently, through Ser<sup>116</sup>Phe substitution exclusively. Even more  
274 remarkably, with HE-Ser<sup>116</sup>Phe mutants gaining dominance, variants emerged that had restored S  
275 affinity to (near)wildtype through substitution of S1<sup>A</sup>-Asn<sup>83</sup> either by Thr or by Ser (**Fig. 3E**).

276 For one of the five clonal populations obtained by endpoint dilution, we unfortunately failed to  
277 determine its genotype for technical reasons. From the NGS analysis of the p1 population, we deduced  
278 that the starting mutant must have been a low affinity S1<sup>A</sup>-Leu<sup>89</sup>Pro variant that, like the S1<sup>A</sup>-  
279 Thr<sup>83</sup>Asn/Ile variants described above, quickly lost the HE-Asn<sup>114</sup> glycan through an HE-Ser<sup>116</sup>Phe  
280 substitution. Oddly enough, the Leu<sup>89</sup>Pro substitution had not been detected by NGS in the pre-cloning  
281 virus stock. Note, however, that this mutation had been selected before twice independently in trials  
282 with rBCoV-HE-F<sup>211</sup>A (**Table 2**). Possibly, it arose spontaneously during end point dilution procedure.  
283 Be that as it may, its *in vitro* evolution proved informative (**Fig. 4A**). NGS analysis of a passage p1  
284 population, resulting from 120-hr multistep propagation, showed that 100% of the viruses coded for

285 HE-Thr<sup>114</sup>Asn/Ser<sup>116</sup>Phe in combination with S1<sup>A</sup>-Pro<sup>89</sup> (53.3%), - Thr<sup>89</sup> (40.5%), or -Ser<sup>89</sup> (2%). Note that  
286 the relationship between these variants and the course of evolution –from Leu<sup>89</sup> in the parental  
287 recombinant virus to Pro and from Pro to Thr or Ser– is evident from the codon sequences  
288 (CTA→CCA→T/ACA) and that the Thr<sup>89</sup> and Ser<sup>89</sup> substitutions restored S RBS affinity almost to that  
289 of wildtype RBS (**Fig. 4B**). All three variants - S1<sup>A</sup>-Pro<sup>89</sup>, -Thr<sup>89</sup> and -Ser<sup>89</sup>, were readily cloned and  
290 isolated by standard endpoint dilution, and propagated independently without a requirement for  
291 exogenous RDE. p1 also contained a minor population of viruses with parental S1<sup>A</sup>, presumably  
292 regenerated from S1<sup>A</sup>-Pro<sup>89</sup>, which as for the S1<sup>A</sup>-Thr<sup>89</sup> and Ser<sup>89</sup> variants would have required only a  
293 single nucleotide substitution (CCA→CTA). Apparently, with HE lectin function partially restored,  
294 viruses that regained (near) wildtype S affinity had a selective advantage. At the end of passage p2,  
295 S1<sup>A</sup>-Pro<sup>89</sup> variants had dwindled to less than 1.5%, S1<sup>A</sup>-Thr<sup>89</sup> had become dominant at 75% and viruses  
296 with parental S1<sup>A</sup>-Leu<sup>89</sup> had rapidly risen from 2.25% in p1 to 23% (**Fig. 4A**).

297 In summary, the introduction of a glycosylation site in the HE lectin domain that reduced receptor-  
298 binding affinity and, thereby, reduced sialate-*O*-acetyltransferase activity towards clustered glycotopes,  
299 triggered a series of successive mutations in S and HE. Thus, the data directly demonstrate HE-S co-  
300 evolution. Moreover, the findings suggest that virions are under selective pressure not only to balance  
301 receptor-binding and receptor-destroying activities in apparent relation to cell-surface receptor-  
302 densities, but also, within these constraints, to maximize virion avidity.

303 **Cell culture adapted BCoV and OC43 strains differ in their set point of the S/HE balance.** The impact  
304 of loss of function mutations in the BCoV HE lectin domain was unexpected, because this defect seems  
305 well tolerated by the prototype OC43 laboratory strain USA/1967. In HRT18 cells, it grows to titers  
306 comparable to those of BCoV reference strain Mebus. Next gen sequencing of OC43 stocks revealed  
307 heterogeneity, but no indications for the existence of low S affinity minority variants that would  
308 support replication of majority high S affinity viruses. Also, clonal virus populations obtained by end  
309 point dilution (10/10) all conformed to the S1<sup>A</sup> master sequence. We offer that instead OC43-  
310 USA/1967 may have reached a viable S/HE balance compatible with efficient *in vitro* propagation

311 through adaptations in S that reduced receptor-binding affinity and/or altered receptor fine-  
312 specificity. When measured by solid phase assay with bivalent S1<sup>A</sup>-Fc fusion proteins, binding of the S  
313 protein of OC43 USA/1967 to bovine submaxillary mucin, containing both mono- and di-*O*-acetylated  
314  $\alpha$ 2,6-sialoglycans, is 16 to 32-fold lower than that of BCoV-Mebus<sup>32</sup>. sp-LBA with BSM preparations,  
315 selectively depleted for either 9-*O*- or 7,9-di-*O*-Sias, showed that BCoV S, like BCoV HE<sup>28</sup>, preferentially  
316 binds to 7,9-di-*O*-Ac-Sias (**sFig. 6A**). OC43 USA/1967 S1<sup>A</sup> may not share this preference. Apparently  
317 due to its low affinity, detectable binding to BSM was lost upon depletion of either type of Sia (**sFig.**  
318 **6A**). Moreover, even though BCoV-Mebus S preferably binds to 7,9-di-*O*-Ac-Sia, monovalent one-on-  
319 one binding of the BCoV S1<sup>A</sup> domain to  $\alpha$ 2,6-linked 9-*O*-acetylated Sia is still 3-fold stronger than that  
320 of OC43-USA/1967 as measured by biolayer interferometry (**sFig. 6B**). On a cautionary note, the  
321 isolation and complex passage history of OC43-USA/1967<sup>43,44</sup> entailed several passages in human  
322 tracheal organ culture, suckling mouse brain and many rounds of replication in cultured cells<sup>9</sup>, which  
323 would have given the virus ample opportunity to adapt to the *in vitro* conditions. Thus, the binding  
324 characteristics of its spike may not faithfully reflect those in circulating field variants. Indeed, OC43  
325 variants in sputum samples, contrary to the OC43 USA/1967, replicate in airway epithelial cell cultures  
326 but not in tissue culture cells<sup>45</sup>.

327

## 328 **DISCUSSION**

329 **Co-evolution and functional interdependence of embecovirus S and HE proteins.** Our findings  
330 demonstrate that in the prototypic  $\beta$ 1CoV BCoV the envelope proteins S and HE are functionally  
331 entwined and co-evolve. We posit that the same holds for other members of the species  
332 *Betacoronavirus-1*, including its zoonotic descendant human coronavirus OC43 and related viruses of  
333 swine, rabbits, dogs and horses, as well as for other *Embecovirus* species, most prominently among  
334 which human coronavirus HKU1. The data lead us to conclude that the respective activities of S and  
335 HE in receptor-binding and catalysis-driven virion elution are balanced to ensure dynamic reversible  
336 virion attachment and, thereby, efficient virus propagation. In consequence, for the viruses listed  
337 above, the roles of S and HE during natural infection cannot be understood in isolation but must be  
338 considered in unison.

339 Using a reverse genetics-based forced evolution approach with BCoV as a model system, we showed  
340 that loss of HE lectin function causes an offset in S-HE balance, practically incompatible with virus  
341 propagation and spread. With the HE lectin domain as modulator of esterase activity, mutations that  
342 decrease or abolish HE RBS affinity reduce virion-associated sialate-*O*-acetyltransferase activity towards  
343 clustered glycotopes on hypervalent glycoconjugates<sup>11</sup> such as are present in the mucus and  
344 glycocalyx in natural tissues and on the surface of cultured cells. The extent of the resultant defect is  
345 such that compensatory second-site mutations in S are selected for that dramatically reduce S RBS  
346 affinity, apparently to restore reversibility of binding as an escape ticket from inadvertent virion  
347 attachment to non-productive sites.

348 The single-amino acid mutations in receptor-binding domain S1<sup>A</sup> were limited to a finite number of  
349 positions, either within or proximal to the RBS to directly affect protein-ligand interactions, or more  
350 distal to reduce RBS affinity through long range effects or by disrupting local folding through aberrant  
351 disulfide-bonding. Whereas the parental recombinant viruses, defective in HE lectin function but with  
352 wildtype S RBS affinity, require an external source of receptor-destroying enzyme for propagation,  
353 their progeny escape mutants regained propagation-independence by lowering S affinity.

354 In expanding clonal populations of HE-defective rBCoV-HE-F<sup>211</sup>A, propagated in the absence of  
355 exogenous receptor-destroying enzyme activity, viruses with reduced S affinity gained a selective  
356 advantage initially. Upon prolonged passage, however, quasispecies developed in which loss of HE  
357 lectin function was compensated at the population level. Variants that combined the HE-Phe<sup>211</sup>Ala  
358 mutation with (near) wildtype affinity S proteins increased to dominate the swarm at least  
359 numerically. Still, these high affinity S variants for their proliferation were strictly reliant on minority  
360 low affinity S variants. This relationship extends beyond cooperativity and group selection described  
361 for other systems<sup>46–52</sup> and amounts to a state of dependency. We propose that the virions of the low  
362 affinity minority variants provide aid by serving as a source of exogenous sialate-*O*-acetyltransferase  
363 activity. They themselves evade decoy receptors through enhanced reversibility of virion attachment,  
364 but this phenomenon increases their motility -whether by sliding diffusion or binding-rebinding-  
365 causing them to deplete cell surface 9-*O*-Ac-Sias, decoy receptors and functional receptors alike. With  
366 increasing concentrations of low affinity virions in the culture supernatant, high affinity variants would  
367 profit progressively, whereas falling cell surface receptor densities would put the low affinity viruses  
368 increasingly at a disadvantage.

369 The forced evolution trials performed with rBCoV-HE-F<sup>211</sup>A were restricted in course and outcome by  
370 design, because full reversion would require simultaneous mutation of two adjacent nucleotides.  
371 Moreover, the crucial role of the Phe<sup>211</sup> in ligand binding (**sFig. 1**) obviates conservative substitutions  
372 <sup>17</sup>. Although rBCoV-HE<sup>A211V</sup> variants did emerge in two separate experiments, this mutation only  
373 marginally increases HE RBS affinity and sialate-*O*-acetyltransferase activity.

374 In contrast to the HE-Phe<sup>211</sup>Ala mutation, the deleterious effect of N-glycosylation at HE-Asn<sup>114</sup> can be  
375 reversed, completely or partially, through various single-nucleotide substitutions in codons 114 and  
376 116 and would therefore more readily allow for compensatory mutations also in HE. Indeed, serial  
377 passage of the rBCoV-HE-Thr<sup>114</sup>Asn resulted in a succession of mutations alternatingly in HE and S. The  
378 order of appearance of these mutations and their effect on protein function indicated that they were  
379 not fixed to merely restore the balance between attachment and catalysis-driven virion elution. The



380 HE-Thr<sup>114</sup>Asn substitution initially selected for second-site mutations that reduced S affinity (Thr<sup>83</sup>Ile,  
381 Thr<sup>83</sup>Asn and Leu<sup>89</sup>Pro), but with propagation thus recovered, derivatives rapidly emerged with  
382 increased HE lectin and esterase activity through a Ser<sup>116</sup>Phe mutation. Apparently, this created an  
383 HE-S disbalance that in turn favored the selection of viruses with revertant mutations in S that raised  
384 S RBS affinity again to wildtype (Thr<sup>83</sup> → Ile → Thr; Leu<sup>89</sup> → Pro → Leu) or near wildtype levels (Thr<sup>83</sup> → Ile  
385 → Ser; Leu<sup>89</sup> → Pro → Thr/Ser). Conjointly, our findings indicate that through an initial sharp reduction in  
386 overall avidity, compensatory to loss of HE function, virus particles regained the capacity of eluding  
387 non-productive attachment to decoy receptors, but at a fitness penalty. The decrease in S RBS affinity  
388 would predictably lower the specific infectivity of virus particles through a decrease in productive host  
389 cell attachment. The rapid selection of the HE-Ser<sup>116</sup>Phe mutation in a low-affinity S background can  
390 thus be understood to have increased virion avidity, albeit through HE and rather than through S. HE  
391 does have a dual function after all and in influenza viruses C and D as well as in murine coronavirus-1,  
392 it is a receptor-binding protein first and foremost<sup>22,35,53-56</sup>. Of note, the partial Ser<sup>116</sup>Phe reversion of  
393 HE consistently seen in multiple independent experiments, suggests that a return to (near) wildtype  
394 lectin and esterase activity along with a low affinity S would have tipped the scale too much towards  
395 catalytic virion release. We posit that in addition to an optimal balance between receptor-binding and  
396 receptor-destruction, the system strives towards optimal virion avidity (**Fig. 4C**).

397 Under natural circumstances, the set-point of the S/HE balance would be tailored to conditions met  
398 in the target tissues of the intact host. The spontaneous loss of HE lectin function in OC43 and HKU1  
399 may thus be understood to have arisen through convergent evolution as an adaptation to the  
400 sialoglycan composition of the mucus in the human upper respiratory tract and that of the glycocalyx  
401 of the respiratory epithelia<sup>11</sup>. This change, which would predictably reduce virion-associated receptor-  
402 destruction and hence decrease virion elution/increase or prolong virion attachment, might have been  
403 selected for by low density occurrence of 9-O-Ac-sialoglycans in the human upper airways. In  
404 accordance, limited tissue array analyses with HE-based virolectins suggested that these sugars are  
405 not particularly prevalent in the human respiratory tract and by far not as ubiquitous as in the gut<sup>28</sup>.

406 However, full understanding of how the S-HE balance was reset in OC43 and HKU1 upon their zoonotic  
407 introduction and why awaits further analysis of the binding properties and ligand fine-specificity of  
408 the S proteins of naturally occurring variants as well as more quantitative and comprehensive inter-  
409 host comparative analyses of airway sialoglycomes. As an added complication, virion particles  
410 encounter widely different circumstances while traversing the mucus layer, at the epithelial cell  
411 surface, during local cell-to-cell dissemination, and during transmission. It is an open question whether  
412 this selects for majority phenotypes that can cope individually and independently with each of these  
413 different conditions by striking an uneasy compromise with regard to HE/S balance and overall virion  
414 avidity, or whether there is loco-temporal selection for swarms of variants that collectively allow the  
415 virus population as a whole to overcome each hurdle.

416 **Similarities between embeco- and influenza A viruses point to common principles of virion-**  
417 **sialoglycan receptor-usage.** The embecovirus HE gene originated from a horizontal gene transfer  
418 event, presumably with an influenza C/D-like virus as donor<sup>17,57</sup>. Like the orthomyxovirus  
419 hemagglutinin-esterase fusion proteins, the newly acquired coronavirus HE protein provided the  
420 acceptor virus with an opportunity to reversibly bind to 9-*O*-Ac-sialoglycans<sup>26</sup>. This in turn would seem  
421 to have prompted a shift in the receptor-specificity of S through adaptations in S1<sup>A</sup> that created a 9-  
422 *O*-Ac-Sia binding site *de novo* so that virions could now attach to these receptor determinants also via  
423 S. The embecoviruses thus adopted a strategy of receptor usage entailing a concerted and carefully  
424 fine-tuned activity of two envelope proteins that is unique among coronaviruses, but uncannily similar  
425 to that of influenza A viruses. In the latter, the hemagglutinin (HA), as a pendant of S, mediates binding  
426 to either  $\alpha$ 2,3- or  $\alpha$ 2,6-linked sialosides, while the neuraminidase, like HE, is a receptor-destroying  
427 enzyme with a substrate fine-specificity that closely matches HA ligand preference<sup>58</sup>. For influenza A  
428 virus, the existence and biological relevance of a functional balance between receptor-binding and  
429 receptor destruction is well recognized<sup>59-62</sup>. This balance is critical for receptor-associated virus  
430 motility through the mucus and at the cell surface<sup>63-68</sup>. Complete or partial loss of NA activity -whether  
431 invoked spontaneously, through reverse genetics or by viral propagation in the presence of NA

432 inhibitors- selects for mutations around the HA receptor-binding pocket that reduce HA affinity<sup>60,69,70</sup>.  
433 Furthermore, as proposed here for HE, NA contributes to virion attachment and even compensates  
434 for loss of virion avidity in mutant viruses with reduced HA affinity<sup>71</sup>. Different from HE, NA may do so  
435 via its catalytic pocket which doubles as a Sia-binding site<sup>72</sup>. However, NA also possesses a second Sia  
436 binding site<sup>73,74</sup>, which like the HE lectin domain, regulates NA activity and which, in further analogy,  
437 is conserved or lost in apparent correlation with host tropism<sup>75-77</sup>. Finally, among many other  
438 similarities to embecoviruses, influenza A variants with different set points in their HA-NA functional  
439 balance may cooperate to support their propagation in cultured cells<sup>48</sup>. Our observations establish  
440 that there are common principles of virion-sialoglycan interactions that prompted convergent  
441 evolution of  $\beta$ 1CoVs and influenza A viruses. Although these two groups of viruses essentially differ in  
442 genome type and replication strategy, envelope proteins, and receptors, they seem to be subject to  
443 the same rules of engagement with respect to dynamic receptor-binding, the differences between  
444 them constituting variations on a theme. This implies that observations made for the one system are  
445 informative for the other. Perhaps more importantly, insight into the overriding principles of virus-  
446 glycan interactions may open avenues to common strategies for antiviral intervention.

447

448 **Figures**

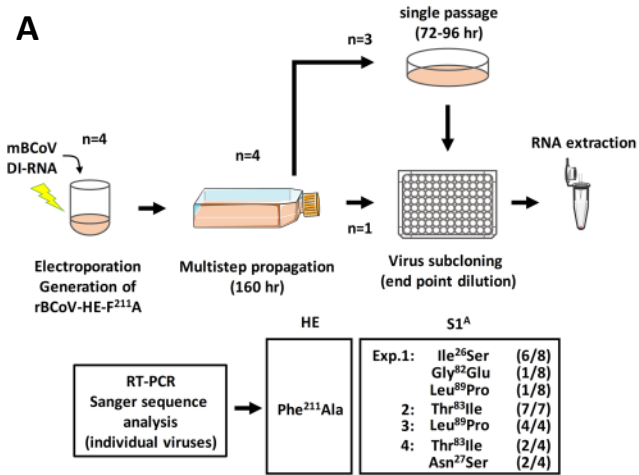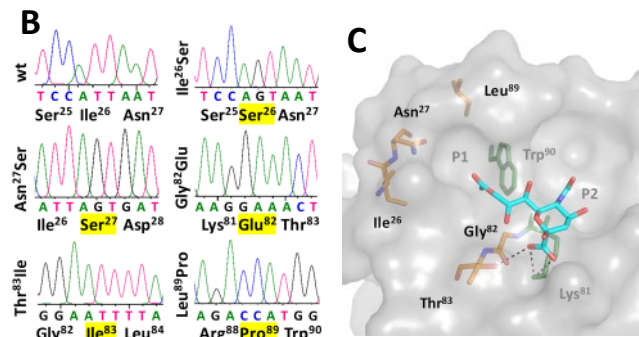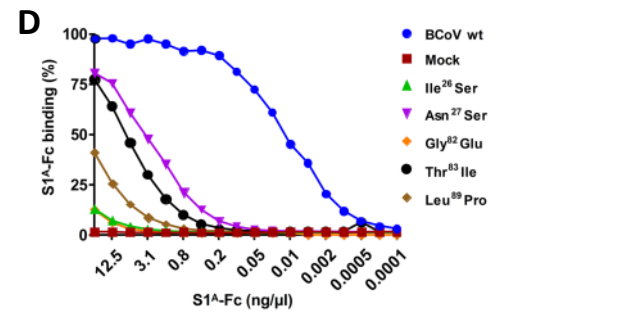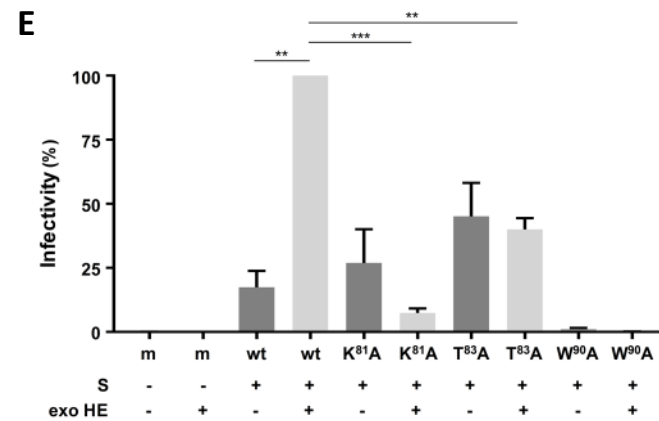

449

450

451 **Fig. 1. Site-directed mutagenesis of BCoV HE by targeted recombination; loss of HE lectin activity**  
452 **selects for second-site mutations in domain 1<sup>A</sup> of the spike protein.** (A) Schematic outline of four  
453 independent experiments, depicting each step from targeted RNA recombination and virus rescue to  
454 virus purification and genetic analysis of the resultant clonal populations by RT-PCR and Sanger  
455 sequencing. The number of virus clones, found to contain a particular S1<sup>A</sup> mutation, relative to the  
456 total number of virus clones analyzed are given (between parenthesis). (B) Relevant portions of Sanger  
457 DNA sequencing chromatograms of the S1<sup>A</sup> coding region in recombinant wildtype BCoV and in cloned  
458 rBCoV-HE-Phe<sup>211</sup>Ala derivatives. Amino acid substitutions marked in yellow. (C) Second-site mutations  
459 in S1<sup>A</sup> locate in close proximity of the RBS. Close-up of the BCoV S1<sup>A</sup> RBS (in surface representation;  
460 PDB:4H14), with 9-*O*-Ac-Sia (in sticks, colored by element; oxygen, red; nitrogen, blue; carbons, cyan)  
461 modeled in the RBS<sup>32</sup>, showing the locations of the mutations. Key elements of the RBS (hydrophobic  
462 pockets P1 and P2, and the side chains of RBS residues Lys<sup>81</sup> and Trp<sup>90</sup> in sticks, colored green) are  
463 indicated. Side chains and connecting main chains of RBS mutations also shown in sticks, but with  
464 carbon colored orange. Predicted hydrogen bonds between the Sia carboxylate moiety and the side  
465 chains of Lys<sup>81</sup> and Thr<sup>83</sup> shown as black dashed lines. (D) The S1<sup>A</sup> mutations strongly reduce binding  
466 to 9-*O*-Ac-Sia. Mutant S1<sup>A</sup>-Fc fusion proteins in twofold serial dilutions, starting at 2.5 µg/well, were  
467 tested by sp-LBA for their binding to BSM relative to that of wildtype S1<sup>A</sup>-Fc. Binding expressed in  
468 percentages with maximum binding of wildtype S1<sup>A</sup>-Fc set to 100%. (E) Infectivity of VSV particles,  
469 pseudotyped with low affinity BCoV S variants, is inhibited rather than promoted by soluble  
470 ‘exogenous’ sialate-*O*-acetyltransferase. HRT18 cells were inoculated with equal amounts of G-deficient  
471 VSV particles, pseudotyped with BCoV S or mutants thereof, either with (+) or without (-) soluble  
472 exogenous sialate-*O*-acetyltransferase (‘exo HE’) added to the inoculum. ‘Infectivity’ expressed in RLU  
473 in cell lysates at 18 h p.i., normalized to those measured for VSV-S<sup>wt</sup>. The data shown are averages  
474 from three independent experiments, each of which performed with technical triplicates. SDs and  
475 significant differences, calculated by Welch’s unequal variances *t* test, are indicated (\*\**P* ≤ 0.01; \*\*\**P*  
476 ≤ 0.001).

**A**

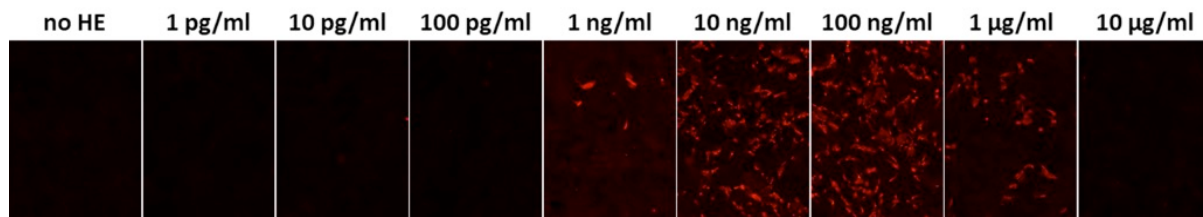

**B**

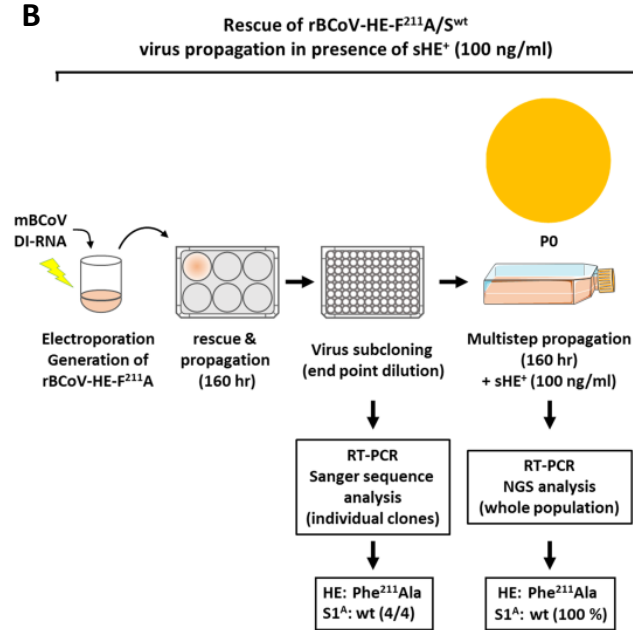

**C**

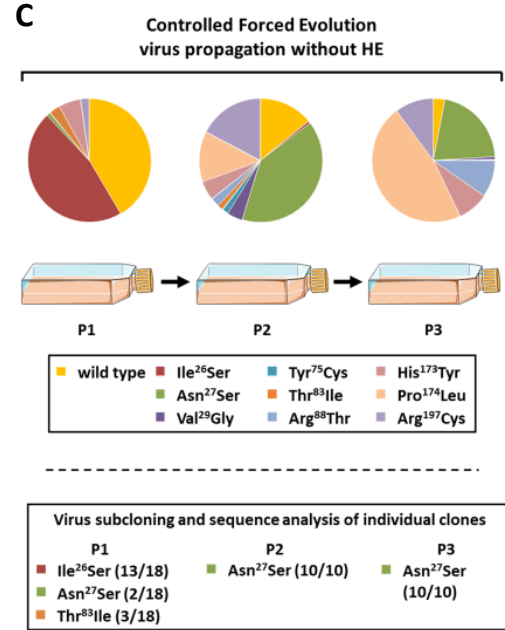

**D**

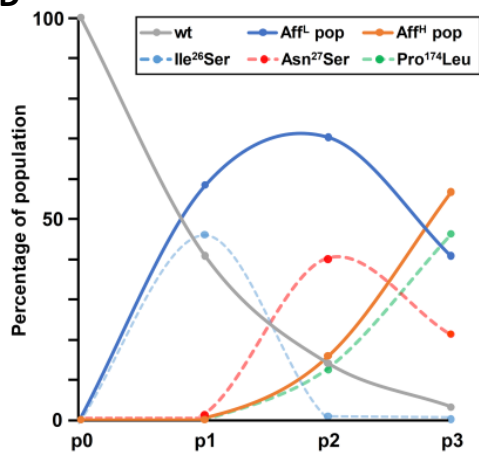

477

478 **Fig. 2. Stable propagation and controlled directed evolution of rBCoV-HE-F<sup>211A</sup>.** (A) rBCoV-HE-F<sup>211A</sup>A

479 propagation and spread is enhanced by soluble exogenous sialate-*O*-acetyltransferase. mBCoV-infected

480 LR7 cells, donor RNA-transfected to generate rBCoV-HE-F<sup>211A</sup>, were seeded on HRT18 cell monolayers

481 to rescue recombinant viruses with cell culture supernatants supplemented with purified BCoV HE<sup>+</sup>-

482 Fc at concentrations indicated. Cell supernatants, harvested 120 hr after seeding, were inoculated

483 onto HRT18 cells grown on glass coverslips. After a single infectious cycle (12 hr p.i.), infected cells  
484 were identified by immunofluorescence assay. Infected cells stained red. (B) Stable maintenance of  
485 wildtype S protein in rBCoV-HE-F<sup>211</sup>A in the presence of exogenous HE and (C) forced evolution in the  
486 absence thereof. Visual representation of experimental procedures and findings. Generation of  
487 recombinant rBCoV-HE-F<sup>211</sup>A by targeted recombination was as in Fig. 1, but with rescue, cloning and  
488 virus amplification steps performed with tissue culture media supplemented with 100ng/ml  
489 exogenous HE-Fc. Rescued virus was purified by endpoint dilution. Individual clonal populations were  
490 characterized for HE and S1<sup>A</sup> master sequences by extracting viral genomic RNA from the cell culture  
491 supernatant followed by RT-PCR and Sanger sequencing. One clonal population was used to grow a  
492 p0 stock of rBCoV-HE-F<sup>211</sup>A and HE and S1<sup>A</sup> diversity was assessed by next gen illumina sequence  
493 analysis (NGS). The virus was used to inoculate  $5 \times 10^6$  HRT18 cells at an MOI of 0.005 TCID<sub>50</sub>/cell and  
494 serially passaged. Cell culture supernatants were harvested at 120 hr p.i. and virus diversity was  
495 assessed by subcloning and genetic analysis of purified viruses as in Fig. 1. In addition, viral RNA was  
496 extracted, and diversity determined by RT-PCR amplification and NGS. Frequencies of S1<sup>A</sup> variants are  
497 presented in pie charts with individual color coding as indicated. (D) Propagation of rBCoV-HE-F<sup>211</sup>A  
498 quasispecies selects for variants with (near) wildtype S affinity. Stylized graph representation depicting  
499 the emergence and decline of viral variants during serial passage of rBCoV-HE-F<sup>211</sup>A in the absence of  
500 exogenous HE. Changes in the frequencies of variants with wildtype S and groups of variants with low  
501 affinity S (sum of Ile<sup>26</sup>Ser, Asn<sup>27</sup>Ser, Val<sup>29</sup>Gly, Thr<sup>83</sup>Ile, His<sup>173</sup>Tyr and Arg<sup>197</sup>Cys) and high affinity S (sum  
502 of Arg<sup>88</sup>Thr and Pro<sup>174</sup>Leu) are depicted with solid lines, colored in gray, blue and orange, respectively.  
503 Those of individual S variants, Ile<sup>26</sup>Ser, Asn<sup>27</sup>Ser and Pro<sup>174</sup>Leu, are shown in dashed lines and colored  
504 light blue, red and green, respectively.

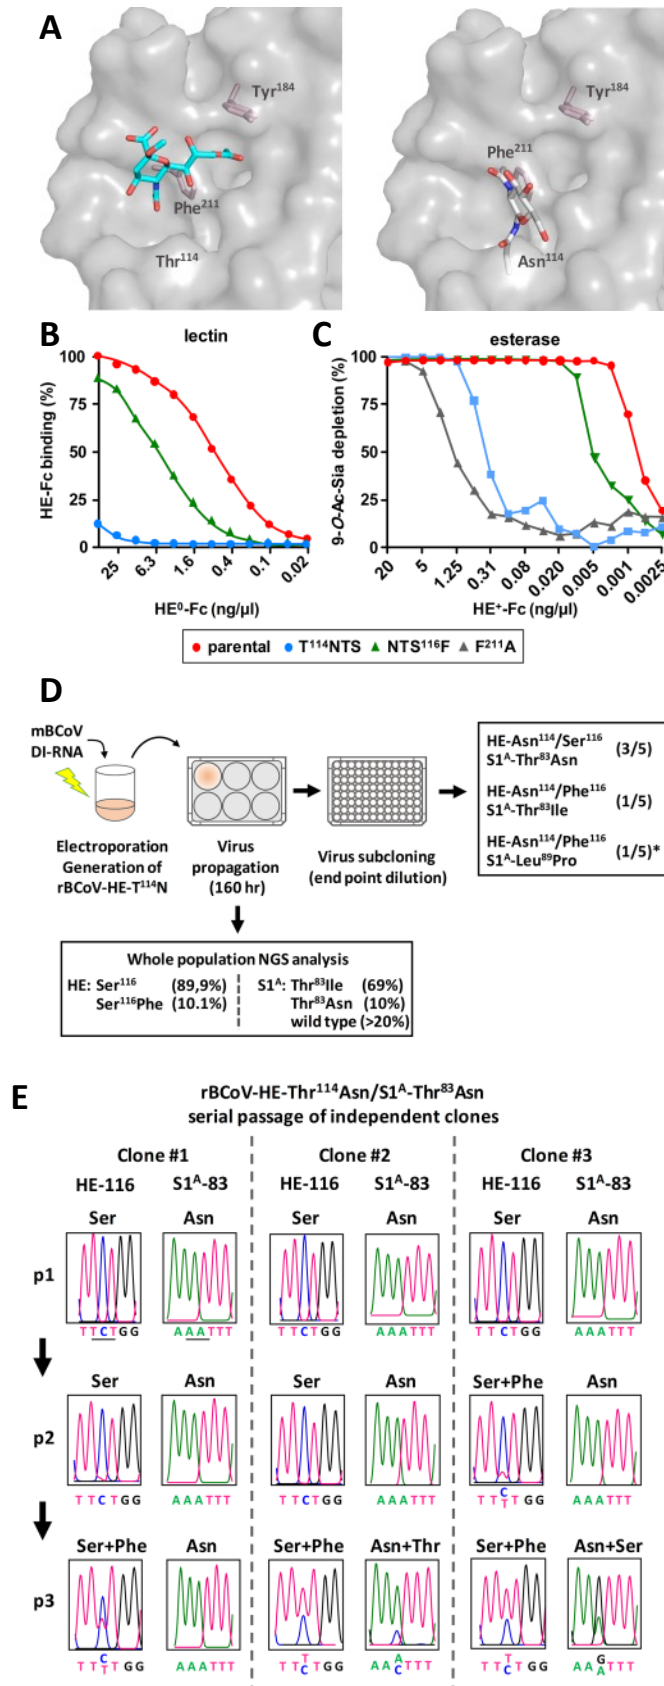

505  
506



507 **Fig. 3. BCoV S and HE co-evolve to restore functional balance and optimal virion avidity. (A)**  
508 Introduction of an N-glycosylation site at the rim of the HE RBS. Side-by-side close ups of the BCoV HE  
509 holostructure<sup>17</sup> (PDB 3CL5) in surface representation with 9-*O*-Ac-Sia (in sticks, colored by element;  
510 oxygen, red; nitrogen, blue; carbons, cyan) bound to the RBS (left) or without the ligand and with the  
511 Thr<sup>114</sup>Asn substitution and N-linked glycan modelled in the RBS (in sticks, colored by element as above  
512 but with carbons in white) (right). Modelling performed by superpositioning of the OC43 strain  
513 NL/A/2005 HE structure (PDB 5N11) and confirmed in Coot. HE RBS key residues are indicated, with  
514 side chains of Tyr<sup>184</sup> and Phe<sup>211</sup> shown in sticks. (B) Loss of HE lectin function upon introduction of an  
515 N-glycosylation site through HE-Thr<sup>114</sup>Asn substitution and partial restoration through a second-site  
516 Ser<sup>116</sup>Phe mutation. Sp-LBA with serial dilutions of enzyme-inactive HE<sup>0</sup>-Fc as in Fig. 1D. (C)  
517 Consequences for HE esterase activity towards clustered ligands. On-the-plate receptor depletion  
518 assay with bovine submaxillary mucin as substrate as in<sup>11</sup>. The assay was performed with 2-fold serial  
519 dilutions of enzymatically active HE<sup>+</sup>-Fc and residual 9-*O*-Ac-Sia measured by sp-LBA with a fixed  
520 amount of HE<sup>0</sup>-Fc. (D) Visual representation of experimental procedures and findings as in Figs. 1 and  
521 2. Note that of five virus clones purified by endpoint dilution, the identity of one isolate could not be  
522 established and was deduced from subsequent propagation experiments as explained in the text  
523 (marked with \*; see also Fig. 4). (E) Serial passage of rBCoV-HE-Thr<sup>114</sup>Asn/S1<sup>A</sup>-Thr<sup>83</sup>Asn selects for  
524 successive mutations in HE and S to restore their function to near wildtype levels. Results are shown  
525 for three independent isolates. Viral RNA extracted from tissue culture supernatants collected at the  
526 end of each passage was characterized by RT-PCR and Sanger DNA sequencing. Relevant portions of  
527 Sanger DNA sequencing chromatograms are presented to show changes in the master sequence of  
528 the virus populations at the coding sequence for the N-glycosylation site (HE codon 116) and for the  
529 site of the low affinity S mutation selected initially (S1<sup>A</sup> codon 83).

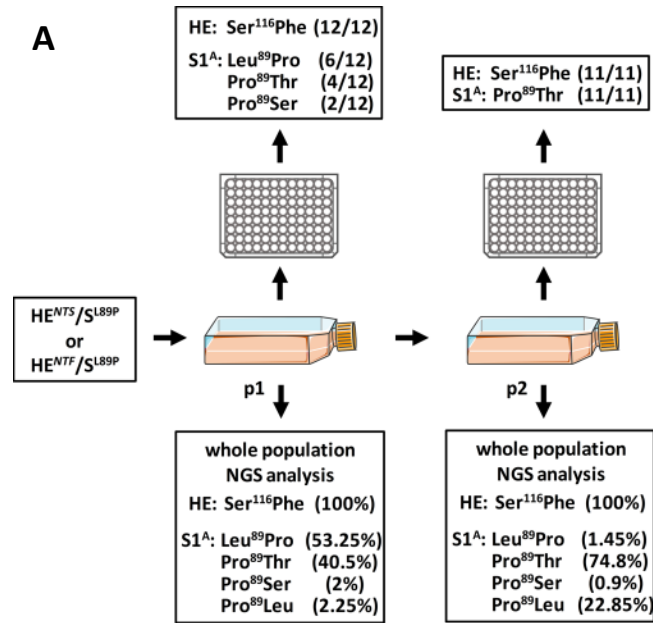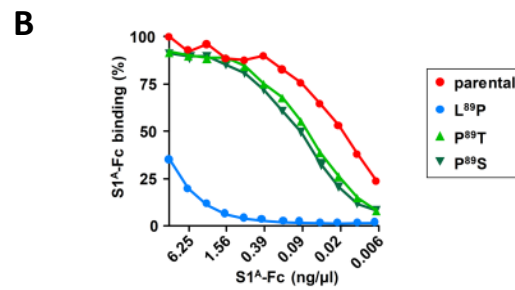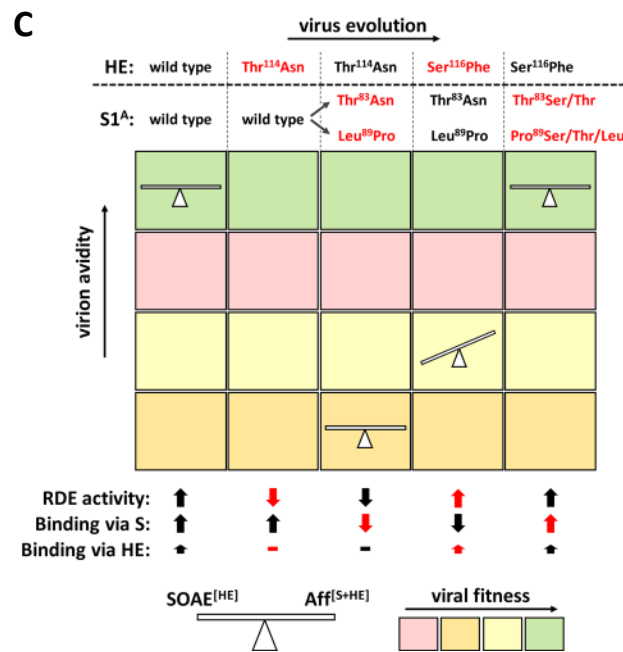

530

531

532 **Fig. 4. Serial passage of rBCoV-HE-T<sup>114</sup>A selects for successive mutations in HE and S to optimize HE/S**  
533 **functional balance and overall virion avidity.** (A) Continued serial passage of rBCoV-HE-  
534 T<sup>114</sup>N+S<sup>116</sup>F/S1<sup>A</sup>-L<sup>89</sup>P. Schematic outline of the experiment and presentation of results of NGS analysis  
535 and genetic characterization of subcloned variants as in Figs. 1, 2 and 3. (B) Re-substitution of S1<sup>A</sup>-  
536 Leu<sup>89</sup>Pro by Thr or Ser restores S1<sup>A</sup> binding to near wildtype levels. Sp-LBA as in Fig. 1D. (C) BCoV is  
537 under selective pressure for an optimal functional balance between virion attachment and catalysis-  
538 driven release as well as for optimal virion avidity. Schematic summary of the evidence for HE-S  
539 coevolution and our interpretation thereof in a two-dimensional chart. The course of evolution of  
540 rBCoV-HE-Thr<sup>114</sup>Asn (direction indicated by arrow) is shown for two types of low affinity S escape  
541 variants (Thr<sup>114</sup>Asn and Leu<sup>89</sup>Pro) with the succession of mutations in HE and S selected for during  
542 serial passage (top) brought in relation to (i) overall virion avidity, as mediated by S and HE, on the Y-  
543 axis from low to high as indicated by the arrow, (ii) viral fitness, color-coded from low (pink) to high  
544 (green) as indicated in the color legend at the bottom, (iii) the effect of the mutations on the function  
545 of S (attachment) and HE (receptor-destroying enzyme (RDE) activity and attachment) as indicated by  
546 thick arrows (arrows pointing up, near wildtype activity; arrows pointing down, decreased function; –  
547 , total loss of function; the size difference between arrows for S and HE reflect the difference in their  
548 contribution to virion binding; to indicate the effect of newly emerging mutations corresponding  
549 arrows for function are colored red) and (iv) their effect on HE-S functional balance (as indicated by  
550 the position of the scale).

551

|                        | Frequency in population <sup>1</sup> |       |       |        |                   |
|------------------------|--------------------------------------|-------|-------|--------|-------------------|
| S1 <sup>A</sup>        | p0                                   | p1    | p2    | p3     | rAff <sup>2</sup> |
| wildtype               | 100                                  | 40.90 | 13.90 | 3.00   | 1.0               |
| Ile <sup>26</sup> Ser  | 0                                    | 45.83 | 0.70  | 0.03   | 0.0000625         |
| Asn <sup>27</sup> Ser  | 0                                    | 0.94  | 39.80 | 21.09  | 0.004             |
| Val <sup>29</sup> Gly  | 0                                    | 0     | 4.10  | 0.65   | 0.008             |
| Tyr <sup>75</sup> Cys  | 0                                    | 0     | 1.60  | 0.02   | ND                |
| Thr <sup>83</sup> Ile  | 0                                    | 2.90  | 1.60  | 0.21   | 0.002             |
| Arg <sup>88</sup> Thr  | 0                                    | 0     | 2.30  | 9.69   | 0.25              |
| His <sup>173</sup> Tyr | 0                                    | 5.77  | 5.00  | 8.10   | 0.03              |
| Pro <sup>174</sup> Leu | 0                                    | 0     | 13.00 | 46.72  | 0.5               |
| Arg <sup>197</sup> Cys | 0                                    | 2.24  | 17.25 | 10,.27 | 0.25              |
| Thr <sup>22</sup> Ile  | NA                                   | NA    | NA    | NA     | 0.015             |
| Asn <sup>27</sup> Tyr  | NA                                   | NA    | NA    | NA     | 0.002             |

552

553 **Table 1.** Virus composition in passages p0 through p3 of controlled forced evolution experiment 1.  
554 <sup>1</sup>Percental occurrence of BCoV S1<sup>A</sup> mutations and <sup>2</sup>their relative binding affinities as measured by  
555 equilibrium endpoint solid phase binding assay with S1<sup>A</sup>-Fc fusion proteins with that of parental BCoV  
556 S1<sup>A</sup>-Fc ('wildtype') set at 1.0. S1<sup>A</sup> variants Thr<sup>22</sup>Ile and Asn<sup>27</sup>Tyr emerged only in experiment 2 (see sFig.  
557 5), but their affinities relative to that of wildtype S1<sup>A</sup> are shown for comparison. (NA, not applicable).  
558

559

| <b>S1<sup>A</sup> residue</b> | <b>E1</b>  | <b>E2</b>  | <b>E3</b>  | <b>E4</b>  | <b>E5</b>  | <b>E6</b>  | <b>E7</b>      |
|-------------------------------|------------|------------|------------|------------|------------|------------|----------------|
| <b>Thr-22</b>                 |            |            |            |            |            | <b>Ile</b> |                |
| <b>Ile-26</b>                 | <b>Ser</b> |            |            |            | <b>Ser</b> |            |                |
| <b>Asn-27</b>                 |            |            |            | <b>Ser</b> | <b>Ser</b> | <b>Tyr</b> |                |
| <b>Val-29</b>                 |            |            |            |            | <b>Gly</b> | <b>Gly</b> |                |
| <b>Tyr-75</b>                 |            |            |            |            | <b>Cys</b> |            |                |
| <b>Gly-82</b>                 | <b>Glu</b> |            |            |            |            |            |                |
| <b>Thr-83</b>                 |            | <b>Ile</b> |            | <b>Ile</b> | <b>Ile</b> |            | <b>Ile/Asn</b> |
| <b>Arg-88</b>                 |            |            |            |            | <b>Thr</b> |            |                |
| <b>Leu-89</b>                 | <b>Pro</b> |            | <b>Pro</b> |            |            |            | <b>Pro</b>     |
| <b>His-173</b>                |            |            |            |            | <b>Tyr</b> | <b>Tyr</b> |                |
| <b>Pro-174</b>                |            |            |            |            | <b>Leu</b> | <b>Leu</b> |                |
| <b>Arg-197</b>                |            |            |            |            | <b>Cys</b> |            |                |

560

561 **Table 2.** Summary of S1<sup>A</sup> mutations identified in rBCoVs upon i. introduction of a HE-Phe<sup>211</sup>Ala  
 562 substitution and virus rescue by straight forward targeted recombination (E1 through E4, see also Fig.  
 563 1), ii. passage of rBCoV-HE-F<sup>211</sup>A/S<sup>wt</sup> in the absence of exogenous HE (E5 and E6) or iii. introduction of  
 564 a HE-Asn<sup>114</sup>Thr substitution and subsequent viral passage (E7).

565

## 566 **Methods**

567 **Cells and viruses.** Human rectal tumor (HRT) 18 (ATCC® CCL-244™) and mouse LR7<sup>41</sup> cells were  
568 maintained in Dulbecco's modified Eagle's medium (DMEM) containing 10% fetal calf serum (FCS),  
569 penicillin (100 IU/ml) and streptomycin (100 µg/ml). BCoV strain Mebus and OC43 strain USA/1967,  
570 purchased from the American Type Culture Collection (ATCC), were propagated in HRT18 cells.

571 **Reverse genetics through targeted recombination.** A reverse genetics system based on targeted RNA  
572 recombination was developed for BCoV strain Mebus essentially as described<sup>15,41,78</sup>. Using  
573 conventional cloning methods, RT-PCR amplicons of the 5'-terminal 601 nts and 3'-terminal 9292 nts  
574 of the BCoV strain Mebus genome (reference Genbank sequence U00735.2) were fused and cloned in  
575 plasmid pUC57, downstream of a T7 RNA polymerase promoter and upstream of a 25-nt poly(A) tract  
576 and a *PacI* site, yielding pD-BCoV1. From this construct, BCoV ORF 4a was deleted (nts 27740-27853)  
577 and replaced by the *Renilla* luciferase (Rluc) gen, yielding pD-BCoV-Rluc. A second pD-BCoV1  
578 derivative, pD-mBCoVΔHE, was created by replacing the coding sequence for the ectodomain of BCoV  
579 S (nts 23641-27433) by the corresponding MHV-A59 sequence and by deleting the BCoV HE gene (nts  
580 22406-23623). The nucleotide sequences of pD-BCoV1, pD-BCoV-Rluc and pD-mBCoVΔHE,  
581 determined by bidirectional Sanger sequence analysis, were deposited in Genbank (accession codes:  
582 XXX).

583 To generate a recombinant chimeric acceptor virus, mBCoVΔHE, HRT18 cells were infected with BCoV-  
584 Mebus at a MOI of 10 TCID<sub>50</sub>/cell and trypsinized and re-suspended in PBS. An aliquot of this  
585 suspension, containing  $1.5 \times 10^6$  cells in 0.8 ml, was mixed with capped synthetic RNA that had been  
586 produced by *in vitro* transcription using the mMESAGE mMACHINE™ T7 Transcription Kit (Thermo  
587 fisher) with *PacI*-linearized mBCoVΔHE vector as template. The mixture was subjected to two  
588 consecutive electrical pulses of 850 V at 20 µF with a Gene Pulser II electroporator (Bio-Rad) and the  
589 cells were then seeded on a confluent monolayer of LR7 feeder cells in a 35mm dish. Incubation was  
590 continued at 37°C, 5% CO<sub>2</sub> for 18 hours post transfection until wide-spread cytopathic effect (CPE) was  
591 apparent. The cell culture supernatant was harvested and cleared by low speed centrifugation at 1200  
592 rpm, and mBCoVΔHE was purified by end-point dilution and used to generate stocks for future usage  
593 in LR7 cells.

594 To generate luciferase-expressing rBCoVs with the BCoV HE and S genes reconstituted, i.e. rBCoV<sup>wt</sup> or  
595 rBCoV-HE-Phe<sup>211</sup>Ala, LR7 cells, infected with mBCoVΔHE at MOI 5, were electroporated as described  
596 above with synthetic RNA transcribed from pD-BCoV-Rluc and derivatives thereof. The infected and  
597 transfected cells were then seeded on HRT18 cell monolayers in 35-mm plates for up to 160 hr. For  
598 rescue and propagation of rBCoV-HE-Phe<sup>211</sup>Ala without second-site mutations in S, the cell culture

599 supernatants were supplemented with 100 ng/ml of BCoV HE-Fc protein<sup>17</sup>. After 5-7 days of incubation  
600 at 37°C, samples of the cell culture supernatants were tested for infectivity by transferring them to  
601 HRT18 cell monolayers grown on 12-mm glass coverslips in 15.6-mm wells. Incubation was continued  
602 for 12 hr after which the cells were fixed with paraformaldehyde and immunofluorescence staining  
603 was performed with polyclonal antiserum from a BCoV-infected cow.

604 **Virus titration, purification and characterization of viral populations.** mBCoV was titrated and cloned  
605 by endpoint dilution on LR7 cells with cytopathic effect as read-out. rBCoVs were titrated and cloned  
606 in HRT18 cells. To identify infected wells, cell supernatants were analyzed by hemagglutination assay  
607 with rat erythrocytes<sup>26</sup> and by *Renilla* luciferase assay (Dual-Luciferase<sup>®</sup> Reporter Assay System,  
608 Promega). Titers were calculated by the Spearman-Kaerber formula. Clonal virus populations were  
609 characterized by isolating viral RNA from 150 µl aliquots of the cell culture supernatant with the  
610 NucleoSpin<sup>®</sup> RNA Virus kit (MACHEREY-NAGEL) followed by conventional RT-PCR and bidirectional  
611 Sanger sequence analysis.

612 **Controlled forced evolution experiments.** Confluent HRT18 monolayers ( $5 \times 10^6$  cells) grown in 25-  
613 cm<sup>2</sup> flasks, were inoculated with rBCoV-HE-F<sup>211</sup>A at an MOI 0.005 in PBS for 1 hr at 37°C. The cells were  
614 washed three times with PBS to remove residual exogenous HE-Fc and incubation was continued in  
615 DMEM + 10% FCS at 37°C, 5% CO<sub>2</sub> for 120 hr post infection (pi) with samples collected every 24 hours  
616 (passage 1). Subsequent 120-hr passages were performed by adding 10 µL of supernatant to new  
617 cultures of HRT18 cells in 25-cm<sup>2</sup> flasks.

618 **Expression and purification of HE-Fc and S1<sup>A</sup>-Fc proteins.** BCoV HE, either enzymatically-active (HE<sup>+</sup>)  
619 or rendered inactive through a Ser<sup>40</sup>Ala substitution (HE<sup>0</sup>), and OC43 S1<sup>A</sup> were expressed as Fc fusion  
620 proteins in HEK293T cells and purified from the cell supernatant by protein A affinity chromatography  
621 as detailed<sup>17,32</sup>. Monomeric S1<sup>A</sup> was obtained by on-the bead thrombin cleavage<sup>32</sup>. pCD5-BCoVHE-T-Fc  
622 vectors<sup>17</sup> encoding mutant BCoV HE derivatives were constructed with the Q5<sup>®</sup> Site-Directed  
623 Mutagenesis Kit per the instructions of the manufacturer.

#### 624 **Pseudovirus entry assays.**

625 The production of BCoV S-pseudotyped VSV-ΔG particles, their characterization by Western blot  
626 analysis, and infectivity assays in HRT18 cells were as described<sup>32</sup>.

627 **Solid-phase lectin binding assay (sp-LBA).** sp-LBA was performed as described<sup>32</sup> with bovine  
628 submaxillary mucin (BSM; Sigma-Aldrich), coated to 96-Well Maxisorp<sup>®</sup> microtitre ELISA plates (Nunc,  
629 0.1 µg BSM per well), serving as a ligand. Binding assays were performed with 2-fold serial dilutions of  
630 HE<sup>0</sup>-Fc, S1<sup>A</sup>-Fc, or mutated derivatives thereof. Receptor-destroying esterase activities of soluble HEs  
631 were measured by on-the-plate 9-O-Ac-Sia depletion assays as described<sup>11,28</sup>.

632 **Hemagglutination assay (HAA).** HAA was performed with rat erythrocytes (*Rattus norvegicus* strain  
633 Wistar; 50% suspension in PBS). Standard HAA was done with two-fold serial dilutions of HE<sup>0</sup>-Fc  
634 proteins (starting at 25 ng/well) as described<sup>17</sup>. High sensitivity nanoparticle HAA (NP-HAA) was  
635 performed as in<sup>32,79</sup>. Briefly, self-assembling 60-meric nanoparticles, comprised of lumazine synthase  
636 (LS), N-terminally extended with the immunoglobulin Fc-binding domain of the *S. aureus* protein A,  
637 were complexed with HE<sup>0</sup>-Fc proteins at a 1:0.6 molar ratio for 30 min on ice. The HE<sup>0</sup>-Fc-loaded  
638 nanoparticles were then 2-fold serially diluted and mixed 1:1 (vol/vol) with rat erythrocytes (0.5% in  
639 PBS). Incubation was for 2 hr at 4°C after which HAA titers were read.

640 **NGS analysis.** Viral RNA from culture supernatants was isolated as described above. HE and S1<sup>A</sup> coding  
641 regions from viral genome of different virus populations were obtained by RT-PCR with primer sets  
642 HE<sub>F</sub> 5'-TTAGATTATGGTCTAAGCATCATG-3' and HE<sub>R</sub> 5'-TTAGATTATGGTCTAAGCATCATG-3', S1<sup>A</sup><sub>F</sub> 5'-  
643 ACCATGTTTTTGATACTTTTA-3' and S1<sup>A</sup><sub>R</sub> 5'-AGATTGTGTTTTACTTAATCTC-3', respectively. Amplicons  
644 were processed in the NGSgo<sup>®</sup> workflow for Illumina according to the Instructions for Use (Edition 4),  
645 except that the fragmentation was prolonged to 40 min at 25°C (protocol 3A). Briefly, amplicons were  
646 subjected to fragmentation and adapter ligation using NGSgo-LibrX (GenDx). Size selection and clean-  
647 up of the samples was performed with SPRI beads (Machery-Nagel). Unique barcodes were ligated to  
648 each sample using NGSgo-IndX (GenDx), after which all samples were pooled and subsequently  
649 purified with SPRI beads, resulting in a library of fragments between ~400 and 1000 bp. The DNA  
650 fragments were denatured and paired-end sequenced on a MiSeq platform (Illumina) using a 300 cycle  
651 kit (V2). FASTQ files were analyzed in NGSengine<sup>®</sup> (GenDx), which aligned the reads to the reference  
652 sequences of HE and S (reference Genbank sequence U00735.2 for BCoV strain Mebus, and  
653 NC\_006213.1 for OC43 strain USA/1967). For the characterization of each virus sample, amplicons  
654 from five independent RT-PCR reactions were analyzed in parallel and mutation frequencies were  
655 determined by averaging the results from these five replicates.

656



## 657 **Author contributions**

658 Y.L., W.L. and R.J.d.G. conceived the study and designed research; Y.L., W.L., D.K. and A.C.S.v.B.  
659 performed research; E.R. and H.M.v.S. performed NGS analysis; Y.L., W.L., Z.L., D.K., A.C.S.v.B., E.R.,  
660 G.J.P.H.B., F.J.M.v.K., B.J.B., E.G.H., H.M.v.S. and R.J.d.G. analyzed data; W.L., Z.L. and G.J.P.H.B.  
661 provided and synthesized reagents; Y.L. and R.J.d.G. wrote the paper. All authors discussed the results  
662 and W.L., Z.L., G.J.P.H.B., F.J.M.v.K., B.J.B., E.G.H. and H.M.v.S. commented on the manuscript.

663

## 664 **Declaration of Interests**

665 The authors declare no competing interests.

666

## 667 **References**

- 668 1. De Wit, E., Van Doremalen, N., Falzarano, D. & Munster, V. J. SARS and MERS: Recent insights  
669 into emerging coronaviruses. *Nature Reviews Microbiology* **14**, 523–534 (2016).
- 670 2. Reusken, C. B. E. M., Raj, V. S., Koopmans, M. P. & Haagmans, B. L. Cross host transmission in  
671 the emergence of MERS coronavirus. *Current Opinion in Virology* **16**, 55–62 (2016).
- 672 3. Wang, C., Horby, P. W., Hayden, F. G. & Gao, G. F. A novel coronavirus outbreak of global  
673 health concern. *Lancet* (2020). doi:10.1016/S0140-6736(20)30185-9
- 674 4. Zhou, P. *et al.* A pneumonia outbreak associated with a new coronavirus of probable bat  
675 origin. *Nature* (2020). doi:10.1038/s41586-020-2012-7
- 676 5. Woo, P. C. Y., Lau, S. K. P., Yip, C. C. Y., Huang, Y. & Yuen, K. Y. More and more coronaviruses:  
677 Human coronavirus HKU1. *Viruses* **1**, 57–71 (2009).
- 678 6. Su, S. *et al.* Epidemiology, Genetic Recombination, and Pathogenesis of Coronaviruses. *Trends*  
679 *in Microbiology* **24**, 490–502 (2016).
- 680 7. de Groot, R., Baker, S., Baric, R., ... L. E.-V. & 2012, U. Family coronaviridae. *Elsevier*  
681 *Amsterdam* 806–828 (2011).
- 682 8. Vijgen, L. *et al.* Evolutionary History of the Closely Related Group 2 Coronaviruses: Porcine  
683 Hemagglutinating Encephalomyelitis Virus, Bovine Coronavirus, and Human Coronavirus  
684 OC43. *J. Virol.* **80**, 7270–7274 (2006).
- 685 9. Vijgen, L. *et al.* Complete Genomic Sequence of Human Coronavirus OC43: Molecular Clock  
686 Analysis Suggests a Relatively Recent Zoonotic Coronavirus Transmission Event. *J. Virol.* **79**,  
687 1595–1604 (2005).
- 688 10. Lau, S. K. P. *et al.* Molecular Epidemiology of Human Coronavirus OC43 Reveals Evolution of  
689 Different Genotypes over Time and Recent Emergence of a Novel Genotype due to Natural  
690 Recombination. *J. Virol.* **85**, 11325–11337 (2011).
- 691 11. Bakkers, M. J. G. *et al.* Betacoronavirus Adaptation to Humans Involved Progressive Loss of  
692 Hemagglutinin-Esterase Lectin Activity. *Cell Host Microbe* **21**, 356–366 (2017).
- 693 12. Hulswit, R. J. G., de Haan, C. A. M. & Bosch, B. J. Coronavirus Spike Protein and Tropism

- 694 Changes. in *Advances in Virus Research* **96**, 29–57 (2016).
- 695 13. King, B. & Brian, D. A. Bovine Coronavirus Structural Proteins. *J. Virol.* **42**, 700–707 (1982).
- 696 14. Kienzle, T. E., Abraham, S., Hogue, B. G. & Brian, D. A. Structure and orientation of expressed  
697 bovine coronavirus hemagglutinin-esterase protein. *J. Virol.* **64**, 1834–8 (1990).
- 698 15. Lissenberg, A. *et al.* Luxury at a Cost? Recombinant Mouse Hepatitis Viruses Expressing the  
699 Accessory Hemagglutinin Esterase Protein Display Reduced Fitness In Vitro. *J. Virol.* **79**,  
700 15054–15063 (2005).
- 701 16. de Groot, R. J. Structure, function and evolution of the hemagglutinin-esterase proteins of  
702 corona- and toroviruses. *Glycoconjugate Journal* **23**, 59–72 (2006).
- 703 17. Zeng, Q., Langereis, M. A., van Vliet, A. L. W., Huizinga, E. G. & de Groot, R. J. Structure of  
704 coronavirus hemagglutinin-esterase offers insight into corona and influenza virus evolution.  
705 *Proc. Natl. Acad. Sci.* **105**, 9065–9069 (2008).
- 706 18. Schultze, B., Wahn, K., Klenk, H. D. & Herrler, G. Isolated HE-protein from hemagglutinating  
707 encephalomyelitis virus and bovine coronavirus has receptor-destroying and receptor-binding  
708 activity. *Virology* **180**, 221–8 (1991).
- 709 19. Vlasak, R., Luytjes, W., Leider, J., Spaan, W. & Palese, P. The E3 protein of bovine coronavirus  
710 is a receptor-destroying enzyme with acetylesterase activity. *J. Virol.* **62**, 4686–90 (1988).
- 711 20. King, B., Potts, B. J. & Brian, D. A. Bovine coronavirus hemagglutinin protein. *Virus Res.* **2**, 53–  
712 59 (1985).
- 713 21. Bakkers, M. J. G. *et al.* Coronavirus receptor switch explained from the stereochemistry of  
714 protein–carbohydrate interactions and a single mutation. *Proc. Natl. Acad. Sci.* **113**, E3111–  
715 E3119 (2016).
- 716 22. Langereis, M. A., Zeng, Q., Heesters, B., Huizinga, E. G. & de Groot, R. J. The murine  
717 coronavirus hemagglutinin-esterase receptor-binding site: A major shift in ligand specificity  
718 through modest changes in architecture. *PLoS Pathog.* **8**, (2012).
- 719 23. Smits, S. L. *et al.* Nidovirus sialate-O-acetylesterases: evolution and substrate specificity of  
720 coronaviral and toroviral receptor-destroying enzymes. *J. Biol. Chem.* **280**, 6933–41 (2005).
- 721 24. Regl, G. *et al.* The hemagglutinin-esterase of mouse hepatitis virus strain S is a sialate-4-O-  
722 acetylesterase. *J. Virol.* **73**, 4721–7 (1999).
- 723 25. Wurzer, W. J., Obojes, K. & Vlasak, R. The sialate-4-O-acetylesterases of coronaviruses related  
724 to mouse hepatitis virus: a proposal to reorganize group 2 Coronaviridae. *J. Gen. Virol.* **83**,  
725 395–402 (2002).
- 726 26. Langereis, M. A., van Vliet, A. L. W., Boot, W. & de Groot, R. J. Attachment of Mouse Hepatitis  
727 Virus to O-Acetylated Sialic Acid Is Mediated by Hemagglutinin-Esterase and Not by the Spike  
728 Protein. *J. Virol.* **84**, 8970–8974 (2010).
- 729 27. Williams, R. K., Jiang, G. S. & Holmes, K. V. Receptor for mouse hepatitis virus is a member of  
730 the carcinoembryonic antigen family of glycoproteins. *Proc. Natl. Acad. Sci.* **88**, 5533–5536  
731 (2006).
- 732 28. Langereis, M. A. *et al.* Complexity and Diversity of the Mammalian Sialome Revealed by  
733 Nidovirus Virolectins. *Cell Rep.* **11**, 1966–1978 (2015).

- 734 29. Schultze, B., Gross, H. J., Brossmer, R. & Herrler, G. The S protein of bovine coronavirus is a  
735 hemagglutinin recognizing 9-O-acetylated sialic acid as a receptor determinant. *J. Virol.* **65**,  
736 6232–7 (1991).
- 737 30. Huang, X. *et al.* Human Coronavirus HKU1 Spike Protein Uses O -Acetylated Sialic Acid as an  
738 Attachment Receptor Determinant and Employs Hemagglutinin-Esterase Protein as a  
739 Receptor-Destroying Enzyme. *J. Virol.* **89**, 7202–7213 (2015).
- 740 31. Künkel, F. & Herrler, G. Structural and functional analysis of the surface protein of human  
741 coronavirus OC43. *Virology* **195**, 195–202 (1993).
- 742 32. Hulswit, R. J. G. *et al.* Human coronaviruses OC43 and HKU1 bind to 9- O -acetylated sialic  
743 acids via a conserved receptor-binding site in spike protein domain A. *Proc. Natl. Acad. Sci.*  
744 **116**, 2681–2690 (2019).
- 745 33. Langereis, M. A. *et al.* Structural basis for ligand and substrate recognition by torovirus  
746 hemagglutinin esterases. *Proc. Natl. Acad. Sci.* **106**, 15897–15902 (2009).
- 747 34. Rosenthal, P. B. *et al.* Structure of the haemagglutinin-esterase-fusion glycoprotein of  
748 influenza C virus. *Nature* **396**, 92–96 (1998).
- 749 35. Song, H. *et al.* An Open Receptor-Binding Cavity of Hemagglutinin-Esterase-Fusion  
750 Glycoprotein from Newly-Identified Influenza D Virus: Basis for Its Broad Cell Tropism. *PLoS*  
751 *Pathog.* **12**, e1005411 (2016).
- 752 36. Tortorici, M. A. *et al.* Structural basis for human coronavirus attachment to sialic acid  
753 receptors. *Nat. Struct. Mol. Biol.* **26**, 481–489 (2019).
- 754 37. Desforges, M., Desjardins, J., Zhang, C. & Talbot, P. J. The Acetyl-Esterase Activity of the  
755 Hemagglutinin-Esterase Protein of Human Coronavirus OC43 Strongly Enhances the  
756 Production of Infectious Virus. *J. Virol.* **87**, 3097–3107 (2013).
- 757 38. Deregt, D. & Babiuk, L. A. Monoclonal antibodies to bovine coronavirus: Characteristics and  
758 topographical mapping of neutralizing epitopes on the E2 and E3 glycoproteins. *Virology* **161**,  
759 410–420 (1987).
- 760 39. Deregt, D. *et al.* Monoclonal Antibodies to Bovine Coronavirus Glycoproteins E2 and E3:  
761 Demonstration of in vivo Virus-neutralizing Activity. *J. Gen. Virol.* **70**, 993–998 (1989).
- 762 40. Milane, G., Kourtesis, A. B. & Dea, S. Characterization of monoclonal antibodies to the  
763 hemagglutinin-esterase glycoprotein of a bovine coronavirus associated with winter  
764 dysentery and cross-reactivity to field isolates. *J. Clin. Microbiol.* **35**, 33–40 (1997).
- 765 41. Kuo, L., Godeke, G.-J., Raamsman, M. J. B., Masters, P. S. & Rottier, P. J. M. Retargeting of  
766 Coronavirus by Substitution of the Spike Glycoprotein Ectodomain: Crossing the Host Cell  
767 Species Barrier. *J. Virol.* **74**, 1393–1406 (2000).
- 768 42. Masters, P. S. & Rottier, P. J. M. Coronavirus Reverse Genetics by Targeted RNA  
769 Recombination. in *Coronavirus Replication and Reverse Genetics* 133–159 (2005).  
770 doi:10.1007/3-540-26765-4\_5
- 771 43. McIntosh, K., Becker, W. B. & Chanock, R. M. Growth in suckling-mouse brain of 'IBV-like'  
772 viruses from patients with upper respiratory tract disease. *Proc. Natl. Acad. Sci.* **58**, 2268–  
773 2273 (1967).

- 774 44. McIntosh, K., Dees, J. H., Becker, W. B., Kapikian, A. Z. & Chanock, R. M. Recovery in tracheal  
775 organ cultures of novel viruses from patients with respiratory disease. *Proc. Natl. Acad. Sci.*  
776 **57**, 933–940 (1967).
- 777 45. Dijkman, R. *et al.* Isolation and Characterization of Current Human Coronavirus Strains in  
778 Primary Human Epithelial Cell Cultures Reveal Differences in Target Cell Tropism. *J. Virol.* **87**,  
779 6081–6090 (2013).
- 780 46. Vignuzzi, M., Stone, J. K., Arnold, J. J., Cameron, C. E. & Andino, R. Quasispecies diversity  
781 determines pathogenesis through cooperative interactions in a viral population. *Nature* **439**,  
782 344–348 (2006).
- 783 47. Bordería, A. V. *et al.* Group Selection and Contribution of Minority Variants during Virus  
784 Adaptation Determines Virus Fitness and Phenotype. *PLoS Pathog.* **11**, (2015).
- 785 48. Xue, K. S., Hooper, K. A., Ollodart, A. R., Dings, A. S. & Bloom, J. D. Cooperation between  
786 distinct viral variants promotes growth of h3n2 influenza in cell culture. *Elife* **5**, (2016).
- 787 49. Domingo-Calap, P., Segredo-Otero, E., Durán-Moreno, M. & Sanjuán, R. Social evolution of  
788 innate immunity evasion in a virus. *Nat. Microbiol.* **4**, 1006–1013 (2019).
- 789 50. Ciota, A. T., Ehrbar, D. J., Van Slyke, G. A., Willsey, G. G. & Kramer, L. D. Cooperative  
790 interactions in the West Nile virus mutant swarm. *BMC Evol. Biol.* **12**, (2012).
- 791 51. Cao, L. *et al.* Coexistence of Hepatitis B Virus Quasispecies Enhances Viral Replication and the  
792 Ability To Induce Host Antibody and Cellular Immune Responses. *J. Virol.* **88**, 8656–8666  
793 (2014).
- 794 52. Shirogane, Y., Watanabe, S. & Yanagi, Y. Cooperation between different RNA virus genomes  
795 produces a new phenotype. *Nat. Commun.* **3**, (2012).
- 796 53. Herrler, G. *et al.* The receptor-destroying enzyme of influenza C virus is neuraminidase-O-  
797 acetyltransferase. *EMBO J.* **4**, 1503–6 (1985).
- 798 54. Rogers, G. N., Herrler, G., Paulson, J. C. & Klenk, H. D. Influenza C virus uses 9-O-acetyl-N-  
799 acetylneuraminic acid as a high affinity receptor determinant for attachment to cells. *J. Biol.*  
800 *Chem.* **261**, 5947–51 (1986).
- 801 55. Hause, B. M. *et al.* Isolation of a Novel Swine Influenza Virus from Oklahoma in 2011 Which Is  
802 Distantly Related to Human Influenza C Viruses. *PLoS Pathog.* **9**, (2013).
- 803 56. Vlasak, R., Krystal, M., Nacht, M. & Palese, P. The influenza c virus glycoprotein (HE) exhibits  
804 receptor-binding (hemagglutinin) and receptor-destroying (esterase) activities. *Virology* **160**,  
805 419–425 (1987).
- 806 57. Luytjes, W., Bredenbeek, P. J., Noten, A. F. H., Horzinek, M. C. & Spaan, W. J. M. Sequence of  
807 mouse hepatitis virus A59 mRNA 2: Indications for RNA recombination between  
808 coronaviruses and influenza C virus. *Virology* **166**, 415–422 (1988).
- 809 58. Long, J. S., Mistry, B., Haslam, S. M. & Barclay, W. S. Host and viral determinants of influenza  
810 A virus species specificity. *Nature Reviews Microbiology* **17**, 67–81 (2019).
- 811 59. Xu, R. *et al.* Functional Balance of the Hemagglutinin and Neuraminidase Activities  
812 Accompanies the Emergence of the 2009 H1N1 Influenza Pandemic. *J. Virol.* **86**, 9221–9232  
813 (2012).

- 814 60. Mitnaul, L. J. *et al.* Balanced hemagglutinin and neuraminidase activities are critical for  
815 efficient replication of influenza A virus. *J. Virol.* **74**, 6015–20 (2000).
- 816 61. Wagner, R., Matrosovich, M. & Klenk, H. D. Functional balance between haemagglutinin and  
817 neuraminidase in influenza virus infections. *Reviews in Medical Virology* **12**, 159–166 (2002).
- 818 62. Baum, L. G. & Paulson, J. C. The N2 neuraminidase of human influenza virus has acquired a  
819 substrate specificity complementary to the hemagglutinin receptor specificity. *Virology* **180**,  
820 10–15 (1991).
- 821 63. Cohen, M. *et al.* Influenza A penetrates host mucus by cleaving sialic acids with  
822 neuraminidase. *Viol. J.* **10**, (2013).
- 823 64. Guo, H. *et al.* Kinetic analysis of the influenza A virus HA/NA balance reveals contribution of  
824 NA to virus-receptor binding and NA-dependent rolling on receptor-containing surfaces. *PLoS*  
825 *Pathog.* **14**, (2018).
- 826 65. Matrosovich, M. N., Matrosovich, T. Y., Gray, T., Roberts, N. A. & Klenk, H.-D. Neuraminidase  
827 Is Important for the Initiation of Influenza Virus Infection in Human Airway Epithelium. *J.*  
828 *Virol.* **78**, 12665–12667 (2004).
- 829 66. Sakai, T., Nishimura, S. I., Naito, T. & Saito, M. Influenza A virus hemagglutinin and  
830 neuraminidase act as novel motile machinery. *Sci. Rep.* **7**, (2017).
- 831 67. Yang, Y. *et al.* Receptor usage and cell entry of bat coronavirus HKU4 provide insight into bat-  
832 to-human transmission of MERS coronavirus. *Proc. Natl. Acad. Sci. U. S. A.* **111**, 12516–12521  
833 (2014).
- 834 68. de Vries, E., Du, W., Guo, H. & de Haan, C. A. M. Influenza A Virus Hemagglutinin–  
835 Neuraminidase–Receptor Balance: Preserving Virus Motility. *Trends in Microbiology* (2019).  
836 doi:10.1016/j.tim.2019.08.010
- 837 69. McKimm-Breschkin, J. L. *et al.* Generation and characterization of variants of NWS/G70C  
838 influenza virus after in vitro passage in 4-amino-Neu5Ac2en and 4-guanidino-Neu5Ac2en.  
839 *Antimicrob. Agents Chemother.* **40**, 40–6 (1996).
- 840 70. Hughes, M. T., Matrosovich, M., Rodgers, M. E., McGregor, M. & Kawaoka, Y. Influenza A  
841 Viruses Lacking Sialidase Activity Can Undergo Multiple Cycles of Replication in Cell Culture,  
842 Eggs, or Mice. *J. Virol.* **74**, 5206–5212 (2002).
- 843 71. Wen, F. & Wan, X. F. Influenza Neuraminidase: Underrated Role in Receptor Binding. *Trends*  
844 *in Microbiology* **27**, 477–479 (2019).
- 845 72. Hooper, K. A. & Bloom, J. D. A Mutant Influenza Virus That Uses an N1 Neuraminidase as the  
846 Receptor-Binding Protein. *J. Virol.* **87**, 12531–12540 (2013).
- 847 73. Webster, R. G. *et al.* Antigenic structure and variation in an influenza virus N9 neuraminidase.  
848 *J Virol* **61**, 2910–2916 (1987).
- 849 74. Varghese, J. N. *et al.* Structural evidence for a second sialic acid binding site in avian influenza  
850 virus neuraminidases. *Proc. Natl. Acad. Sci.* **94**, 11808–11812 (1997).
- 851 75. Lai, J. C. C. *et al.* A secondary sialic acid binding site on influenza virus neuraminidase: Fact or  
852 fiction? *Angew. Chemie - Int. Ed.* **51**, 2221–2224 (2012).
- 853 76. Dai, M. *et al.* Mutation of the Second Sialic Acid-Binding Site, Resulting in Reduced

- 854            Neuraminidase Activity, Preceded the Emergence of H7N9 Influenza A Virus. *J. Virol.* **91**,  
855            (2017).
- 856    77.    Du, W. *et al.* The 2nd sialic acid-binding site of influenza A virus neuraminidase is an  
857            important determinant of the hemagglutinin-neuraminidase-receptor balance. *PLoS Pathog.*  
858            **15**, e1007860 (2019).
- 859    78.    Haijema, B. J., Volders, H. & Rottier, P. J. M. Switching Species Tropism: an Effective Way To  
860            Manipulate the Feline Coronavirus Genome. *J. Virol.* **77**, 4528–4538 (2003).
- 861    79.    Li, W. *et al.* Identification of sialic acid-binding function for the Middle East respiratory  
862            syndrome coronavirus spike glycoprotein. *Proc. Natl. Acad. Sci.* **114**, E8508–E8517 (2017).
- 863
